1            **Neural Correlates of Optimal Multisensory Decision Making**

2

3            Han Hou<sup>1,2</sup>, Qihao Zheng<sup>1,2\*</sup>, Yuchen Zhao<sup>1,2\*</sup>, Alexandre Pouget<sup>3#</sup>, Yong Gu<sup>1#§</sup>

4

5            <sup>1</sup>Institute of Neuroscience, Key Laboratory of Primate Neurobiology, CAS Center for Excellence  
6            in Brain Science and Intelligence Technology, Chinese Academy of Sciences, Shanghai, China

7            <sup>2</sup>University of Chinese Academy of Sciences, Beijing, China

8            <sup>3</sup>University of Geneva, Geneva, Switzerland

9

10          \* These authors contributed equally to this work.

11          # These senior authors contributed equally to this work.

12          § Correspondence should be addressed to: Yong Gu ([guyong@ion.ac.cn](mailto:guyong@ion.ac.cn))

13

14

15

## Abstract

16 Perceptual decisions are often based on multiple sensory inputs whose reliabilities rapidly vary  
17 over time, yet little is known about how our brain integrates these inputs to optimize behavior. Here  
18 we show multisensory evidence with time-varying reliability can be accumulated near optimally,  
19 in a Bayesian sense, by simply taking time-invariant linear combinations of neural activity across  
20 time and modalities, as long as the neural code for the sensory inputs is close to an invariant linear  
21 probabilistic population code (ilPPC). Recordings in the lateral intraparietal area (LIP) while  
22 macaques optimally performed a vestibular-visual multisensory decision-making task revealed that  
23 LIP population activity reflects an integration process consistent with the ilPPC theory. Moreover,  
24 LIP accumulates momentary evidence proportional to vestibular acceleration and visual velocity  
25 which are encoded in sensory areas with a close approximation to ilPPCs. Together, these results  
26 provide a remarkably simple and biologically plausible solution to optimal multisensory decision  
27 making.

28

29 **Keywords:** Perceptual decision making, multisensory integration, LIP, probabilistic population  
30 code, vestibular, optic flow, self-motion perception

## 31 **Introduction**

32 Most perceptual decisions are based on multiple sensory inputs whose reliabilities vary over time.  
33 For instance, a predator can rely on both auditory and visual information to determine when and  
34 where to strike a prey, but these two sources of information are not generally equally reliable, nor  
35 are their reliabilities constant over time: as the prey gets closer, the quality of the image and sound  
36 typically improves, thus increasing their reliabilities. Although such multisensory decision making  
37 happens frequently in the real world, the underlying neural mechanisms remain largely unclear.

38

39 The so-called drift-diffusion model (DDM) (<sup>1</sup>Ratcliff, 1978; <sup>2</sup>Ratcliff and McKoon, 2008;  
40 <sup>3</sup>Ratcliff and Rouder, 1998; <sup>4</sup>Ratcliff and Smith, 2004), a widely used model of perceptual  
41 decision making, cannot deal with such decisions optimally in its most standard form. DDMs have  
42 been shown to implement the optimal policy for decisions involving just one source of sensory  
43 evidence whose reliability is constant over time (<sup>5</sup>Laming, 1968; <sup>6</sup>Bogacz, *et al.*, 2006). Under  
44 such conditions, DDMs can implement the optimal strategy by simply summing evidence over time  
45 until an upper or lower bound, corresponding to the two possible choices, is hit (<sup>6</sup>Bogacz, *et al.*,  
46 2006). This type of models lends itself to a straightforward neural implementation in which neurons  
47 simply add their sensory inputs until they reach a preset threshold (<sup>2</sup>Ratcliff and McKoon, 2008;  
48 <sup>7</sup>Gold and Shadlen, 2007).

49

50 When multiple sensory inputs are involved, the standard DDMs can accumulate sensory evidence  
51 optimally as long as the reliabilities of the evidence stay constant during a single trial and across  
52 trials. Under this scenario, optimal integration of evidence over time can be achieved by first taking  
53 a weighted sum of the momentary evidence at each time step, with weights proportional to the  
54 reliability of each sensory stream, followed by temporal integration (<sup>8</sup>Drugowitsch, *et al.*, 2014).  
55 However, this strategy no longer works when the reliabilities change over time within a single trial.

56 In this case, the momentary evidence must be linearly combined with weights proportional to the  
57 time-varying reliabilities, which requires that the synaptic weights change on a very fast time scale  
58 since, in the real life, reliability can change significantly over tens of milliseconds. Moreover, when  
59 the reliabilities of the sensory inputs are not known in advance, which is typically the case in real-  
60 world situations, neurons cannot determine how to appropriately modulate their synaptic weights  
61 until after the sensory inputs have been observed. Therefore, even if it is possible to extend standard  
62 DDMs to time-varying reliability (<sup>8</sup>**Drugowitsch, *et al.*, 2014**), it is unclear how such a solution  
63 could be implemented biologically.

64

65 In contrast, there exists another class of models which does not necessarily involve changes in  
66 synaptic strength. As long as the sensory inputs are encoded with what is known as “invariant linear  
67 probabilistic population codes” (ilPPC), the neural solution for optimal multisensory integration is  
68 remarkably simple: it only requires that neurons compute linear combinations of their inputs across  
69 time or modalities using fixed—reliability-independent—synaptic weights (<sup>9</sup>**Beck, *et al.*, 2008**;  
70 <sup>10</sup>**Ma, *et al.*, 2006**). This solution relies on one specific property of ilPPC: the reliability of the  
71 neural code is proportional to the amplitude of the neural responses. As a result, when summing  
72 two sensory inputs with unequal reliability, the sensory input with the lowest reliability contribute  
73 less to the sum because of its lower firing rate. This is formally equivalent to weighting Gaussian  
74 samples with their reliability in an extended DDM, except that there is no need for actual weight  
75 changes with ilPPC (<sup>10</sup>**Ma, *et al.*, 2006**). Hence, the ilPPC framework is a promising solution to  
76 multisensory decision-making tasks, but it lacks physiological supports.

77

78 To investigate whether the brain may implement this solution, we recorded the activity of single  
79 neurons in the lateral intraparietal area (LIP) in macaques trained to discriminate their heading  
80 direction of self-motion based on multiple sensory inputs: vestibular signals, visual optic flow, or  
81 both. Importantly, the vestibular and visual stimuli followed a Gaussian-shape velocity temporal

82 profile, producing naturally varied cue reliability over time within each trial. This behavioral  
83 paradigm has been well-established for studying multisensory heading discrimination in the past  
84 decade (<sup>11</sup>Fetsch, *et al.*, 2012; <sup>12</sup>Gu, *et al.*, 2008; <sup>13</sup>Fetsch, *et al.*, 2013). Nevertheless, these  
85 previous studies focused on areas that encode momentary heading inputs, leaving it unknown how  
86 these sensory inputs are further accumulated by downstream neurons (e.g. LIP) during perceptual  
87 decision making.

88

89 We focus first in LIP because it is the most extensively studied brain region where buildup choice-  
90 related activity has been found during visuomotor decisions in macaques (<sup>7</sup>Gold and Shadlen,  
91 2007; <sup>14</sup>Shadlen and Newsome, 2001; <sup>15</sup>Shadlen and Newsome, 1996; <sup>16</sup>Huk, *et al.*, 2017;  
92 <sup>17</sup>Roitman and Shadlen, 2002). In addition, LIP receives abundant anatomical inputs  
93 (<sup>18</sup>Boussaoud, *et al.*, 1990) from areas encoding momentary vestibular and visual self-motion  
94 information for heading discrimination, such as the dorsal medial superior temporal (MSTd) area  
95 (<sup>12</sup>Gu, *et al.*, 2008; <sup>19</sup>Gu, *et al.*, 2006) and the ventral intraparietal area (VIP) (<sup>20</sup>Chen, *et al.*, 2011c;  
96 <sup>21</sup>Chen, *et al.*, 2013). It is therefore expected that the activity of LIP neurons should carry buildup  
97 choice signals germane to the formation of multisensory decisions. Note that two recent rodent  
98 studies (<sup>22</sup>Nikbakht, *et al.*, 2018; <sup>23</sup>Raposo, *et al.*, 2014) also have described multisensory decision  
99 signals in rat posterior parietal cortex, a region analogous to its primate counterpart. However, these  
100 studies did not characterize the computational solution implemented by these neural circuits, which  
101 is precisely the question we investigate here. Specifically, we explored whether the response of LIP  
102 neurons is consistent with the iPPC theory in which neurons take fixed linear combinations of their  
103 sensory inputs without any need for complex, time-dependent, modality-specific, reweighting of  
104 the sensory inputs during multisensory decision making.

## 105 **Results**

### 106 **Optimal multisensory decision-making behavior on macaques**

107 We trained two macaque monkeys to perform a vestibular-visual multisensory decision-making  
108 task (<sup>12</sup>Gu, *et al.*, 2008) (**Figure 1a**). On each trial, the monkeys experienced a 1.5s-fixed-duration  
109 forward motion with a small deviation either to the left or to the right of the dead ahead. At the end  
110 of the trial, the animals were required to report the perceived heading direction by making a saccade  
111 decision to one of the two choice targets (**Figure 1b**). We randomly interleaved three cue conditions  
112 over trials: a vestibular condition and a visual condition in which heading information was solely  
113 provided by inertial cues and optic flow, respectively, and a combined condition consisting of  
114 congruent vestibular and visual cues. Importantly, both the vestibular and visual stimuli followed a  
115 Gaussian-shape velocity temporal profile, peaking at the middle of the 1.5-s stimulus duration. This  
116 modulation of velocity over time has an important implication for the reliability of the sensory  
117 inputs provided to the animals. Indeed, previous psychophysical studies have established that a  
118 model in which the reliability of the visual flow field is proportional to velocity and the reliability  
119 of the vestibular signal is proportional to the acceleration, provides the best fits to the behavioral  
120 data (<sup>8</sup>Drugowitsch, *et al.*, 2014). Therefore, this stimulus allows us to test how neural circuits  
121 accumulate multisensory evidence whose reliability varies over time with distinct temporal profiles  
122 (see below).

123

124 To quantify the monkeys' behavioral performance, we plotted psychometric curves for each cue  
125 condition (**Figure 1c**). Consistent with the previous results (<sup>12</sup>Gu, *et al.*, 2008), the monkeys made  
126 more accurate decisions in the combined condition, as evidenced by a steeper psychometric  
127 function and a smaller psychophysical threshold (**Figure 1c**). Across all recording sessions and for  
128 both monkeys, the psychophysical threshold of the combined condition was significantly smaller  
129 than those of single cue conditions and close to the threshold predicted by optimal Bayesian

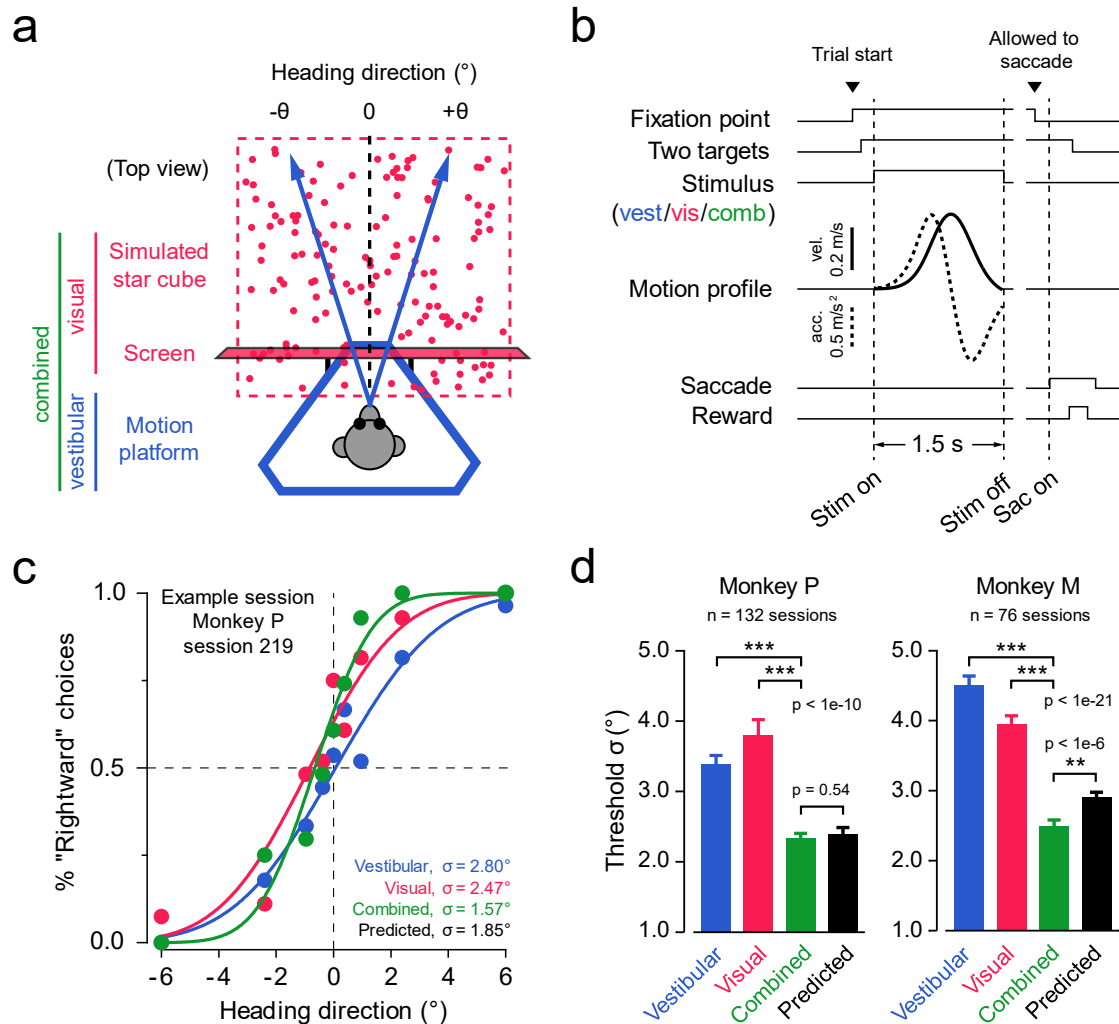

**Figure 1 Optimal cue integration in vestibular-visual multisensory decision-making task.**

**(a)** Schematic drawing of the experimental setup (top view). The vestibular (blue) and visual (red) stimuli of self-motion were provided by a motion platform and an LCD screen mounted on it, respectively. The monkey was seated on the platform and physically translated within the horizontal plane (blue arrows), whereas the screen rendered optic flow simulating what the monkey would see when moving through a three-dimensional star field (red dots). In a combined condition (green), both vestibular and visual stimuli were presented synchronously. The monkey's task was to discriminate whether the heading direction was to the left or the right of the straight ahead (black dashed line). **(b)** Task timeline. The monkey initiated a trial by fixating at a fixation point, and two choice targets appeared. The monkey then experienced a 1.5-s forward self-motion stimulus with a small leftward or rightward component, after which the monkey reported his perceived heading by making a saccadic eye movement to one of the two targets. The self-motion speed followed a Gaussian-shape profile. **(c)** Example psychometric functions from one session. The proportion of "rightward" choices is plotted against the headings for three cue conditions respectively. Smooth curves represent best-fitting cumulative Gaussian functions. **(d)** Average psychophysical thresholds from two monkeys for three conditions and predicted thresholds calculated from optimal cue integration theory (black bars). Error bars indicate s.e.m.; p values were from paired t-test.

131 multisensory integration (<sup>24</sup>Knill and Richards, 1996) (Figure 1d). Therefore, the monkeys can  
132 integrate vestibular and visual cues near-optimally during our multisensory decision-making task.

133

### 134 Heterogeneous multisensory choice signals in LIP

135 Next, we set out to explore how these optimal decisions were formed in the brain. We recorded  
136 from 164 single, well-isolated neurons in LIP of two monkeys while they were performing the task  
137 (Supplementary Figure 1). As expected, we found buildup choice-related signals in LIP neurons  
138 under all cue conditions. As shown in PSTHs of the example cells (Figure 2a and Supplementary  
139 Figure 2), there was generally an increasing divergence between the neuron's firing rate on trials  
140 in which the monkey chose the target in the neuron's response field (IN choices, solid curves) and  
141 trials in which the opposite target was chosen (OUT choices, dashed curves). Importantly, in all cue  
142 conditions, the buildup choice signals tended to be stronger for heading directions more distant  
143 away from straight ahead (Supplementary Figure 3), suggesting that the response of LIP neurons  
144 reflects the accumulation of visual and vestibular sensory evidence for heading judgments.

145

146 To better quantify the choice-related signals, we used a ROC analysis to generate an index of choice  
147 divergence (CD) (<sup>23</sup>Raposo, *et al.*, 2014) that measures the strength of the choice signals (Figure  
148 2b). The four cells illustrated in Fig. 2 exhibited canonical ramping choice signals, but their CDs  
149 varied greatly across cue conditions. For example, for Cell 1, the CD was largest in the combined  
150 condition, modest in the visual condition, and smallest in the vestibular condition. By contrast, for  
151 Cell 4, the CD was largest in the vestibular condition. The heterogeneity of choice signals was also  
152 manifest at the population level. Approximately half of the LIP neurons exhibited statistically  
153 significant CD ( $p < 0.05$ , two-sided permutation test) in each cue condition (vestibular: 52%, visual:  
154 46%, combined: 59%; Figure 2c), but these three subpopulations did not fully overlap. While more  
155 than two thirds of neurons (76%) had significant choice signals in *any* of the three



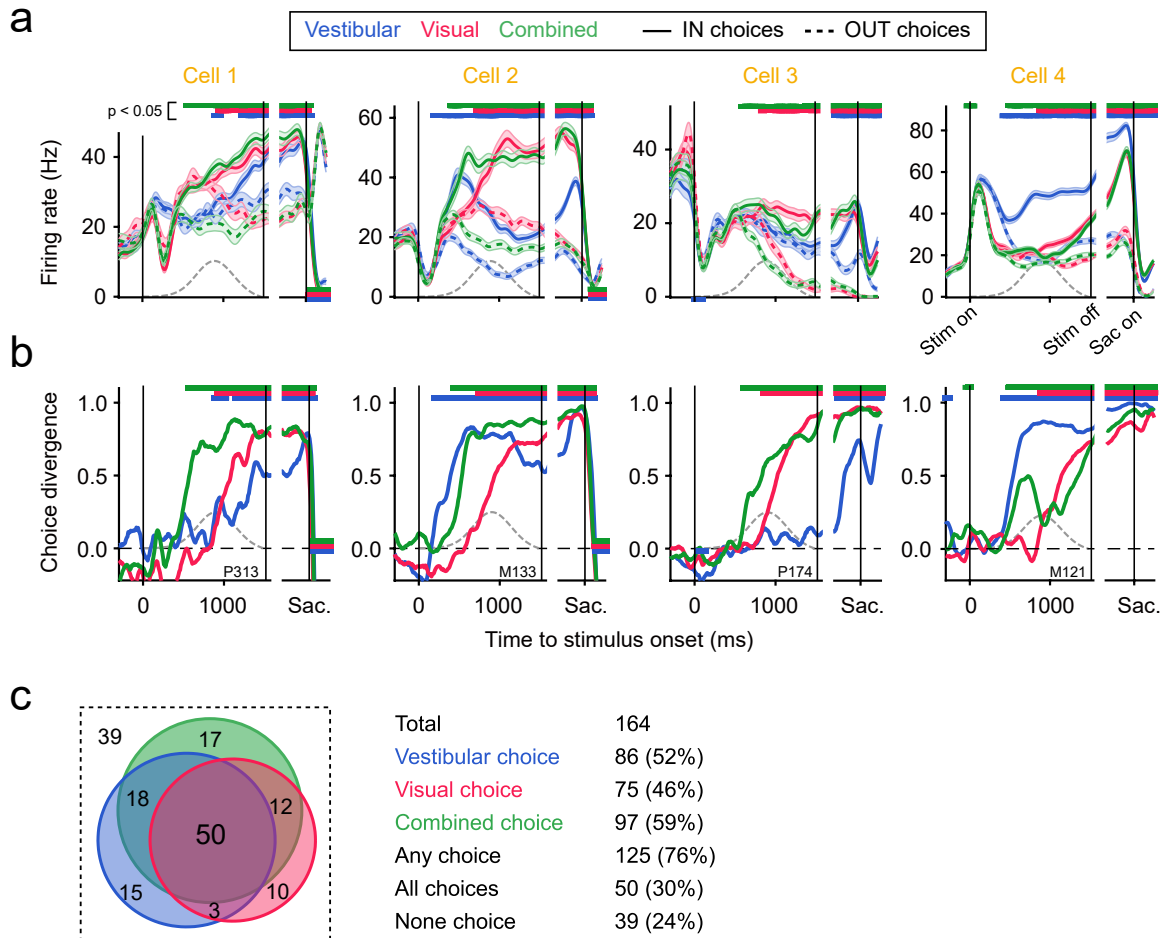

**Figure 2 Heterogeneous choice signals in LIP population.**

**(a)** Peri-stimulus time histograms (PSTHs) of four example cells. Spike trains were aligned to stimulus onset (left subpanels) and saccade onset (right subpanels), respectively, and grouped by cue condition and monkey's choice. Vestibular, blue; visual, red; combined, green. Toward the cell's response field (RF), or IN choices, solid curves; away from the cell's RF, or OUT choices, dashed curves. Mean firing rates were computed from 10-ms time windows and smoothed with a Gaussian ( $\sigma = 50$  ms); only correct trials or  $0^\circ$  heading trials were included. Shaded error bands, s.e.m. Horizontal color bars represent time epochs in which IN and OUT trials have significantly different firing rates ( $p < 0.05$ , t-test), with the color indicating cue condition and the position indicating the relationship between IN and OUT firings (IN > OUT, top; IN < OUT, bottom). Gray dashed curves represent the actual speed profile measured by an accelerometer attached to the motion platform. **(b)** Choice divergence (CD) of the same four cells. CD ranged from -1 to 1 and was derived from ROC analysis for PSTHs in each 10-ms window (see Methods). Horizontal color bars are the same as in **a** except that p-values were from permutation test ( $n = 1000$ ). **(c)** Venn diagram showing the distribution of choice signals. Numbers within colored areas indicate the numbers of neurons that have significant grand CDs (CD computed from all spikes in 0–1500 ms) under the corresponding combinations of cue conditions.

157 conditions (“Any choice” cells in **Figure 2c**), only a third of neurons (30%) had significant choice  
158 signals in *all* of the three conditions (“All choices” cells in **Figure 2c**).

159

160 Apart from the heterogeneous choice signals, LIP also encodes heterogeneous sensory modality  
161 signals. For example, Cell #12 in **Supplementary Figure 2** exhibited differentiated firing rates  
162 across cue conditions without much choice-related signal. In fact, as shown in **Supplementary**  
163 **Figure 4a**, the majority of LIP neurons actually carried mixed choice and modality signals,  
164 exhibiting a category-free like neural representation as previously seen in rat posterior parietal  
165 cortex (<sup>23</sup>Raposo, *et al.*, 2014). However, although randomly mixed at the single neuron level, the  
166 choice and modality signals can still be linearly decoded from the LIP population (**Supplementary**  
167 **Figure 5**). Therefore, we ignore the mixed modality signals thereafter, since they are irrelevant to  
168 our heading discrimination task and orthogonal to the decision signals that we really care about.

169

170 Another potential difficulty in interpreting LIP activity arises from the fact that LIP neurons also  
171 multiplex a combination of temporally overlapping decision- and non-decision- signals (<sup>25</sup>Park, *et*  
172 *al.*, 2014; <sup>26</sup>Meister, *et al.*, 2013). In particular, the signal of saccade preparation may interfere with  
173 the one reflecting evidence accumulation (<sup>14</sup>Shadlen and Newsome, 2001). However, this was not  
174 likely to be an issue in our study. In our fixed-duration task, we introduced a 300–600 ms delay  
175 between the stimulus offset and the time at which the monkey was allowed to saccade (see  
176 Methods). Moreover, the monkeys tended to stop integrating evidence around 500 ms prior to the  
177 stimulus offset (see **Figure 3b** and below), further separating in time the processes of evidence  
178 accumulation and saccade preparation. Therefore, the premotor activity of LIP should not play a  
179 significant role in our analysis of multisensory evidence accumulation.

180

181 **LIP integrates vestibular acceleration and visual velocity**

182 Despite the high degree of heterogeneity, there was nonetheless a property shared amongst the LIP  
183 neurons, namely, the temporal dynamics of the ramping activity was significantly faster in the  
184 vestibular and combined conditions than in the visual condition (**Figure 3**). This was evident not  
185 only in the averaged rate-based or ROC-based measures (“Any choice” cells, **Figure 3a, b**), but  
186 also in the cell-by-cell analysis (**Figure 3c**). Notably, the averaged divergence time under the  
187 vestibular and combined conditions aligned well to the acceleration peak of the Gaussian-shape  
188 motion profile, whereas the divergence time under the visual condition better aligned to the velocity  
189 peak (**Figure 3c**, dashed curves). This suggests that the physical quantities being integrated over  
190 time are speed for the visual stimulus and acceleration for the vestibular stimulus.

191

192 An alternative explanation, however, might be that the apparent ~400 ms interval between the  
193 vestibular and visual ramping was caused purely by a difference in their sensory latencies rather  
194 than in their underlying physical quantities. For example, LIP activity could have been driven by  
195 an ultrafast vestibular signal but a slow visual signal, both of which followed the velocity of the  
196 motion. To test this, we designed an experiment in which we used two distinct velocity profiles, a  
197 wide one and a narrow one (**Figure 3d**). These profiles were designed to have temporally aligned  
198 velocity peaks but misaligned acceleration peaks. If our original physical-quantity hypothesis was  
199 correct, we would expect the visual ramping to remain nearly the same under both profiles, while  
200 the vestibular ramping should start earlier for the wide profile than for the narrow one, thus  
201 reflecting the earlier acceleration peak under the wide profile. In contrast, if the sensory-latency  
202 hypothesis was correct, there should be no shift in either the vestibular or visual ramping across the  
203 two profiles. Our data matches the first prediction (**Figure 3e, f**). In other words, the temporal  
204 discrepancy between the vestibular and visual ramping activities indeed resulted from different  
205 physical quantities underlying the momentary evidence fed into LIP. This physiological finding  
206 echoed a recent psychophysical study showing that, at the behavioral level, human subjects  
207 optimally integrate vestibular and visual momentary evidence with reliability following the

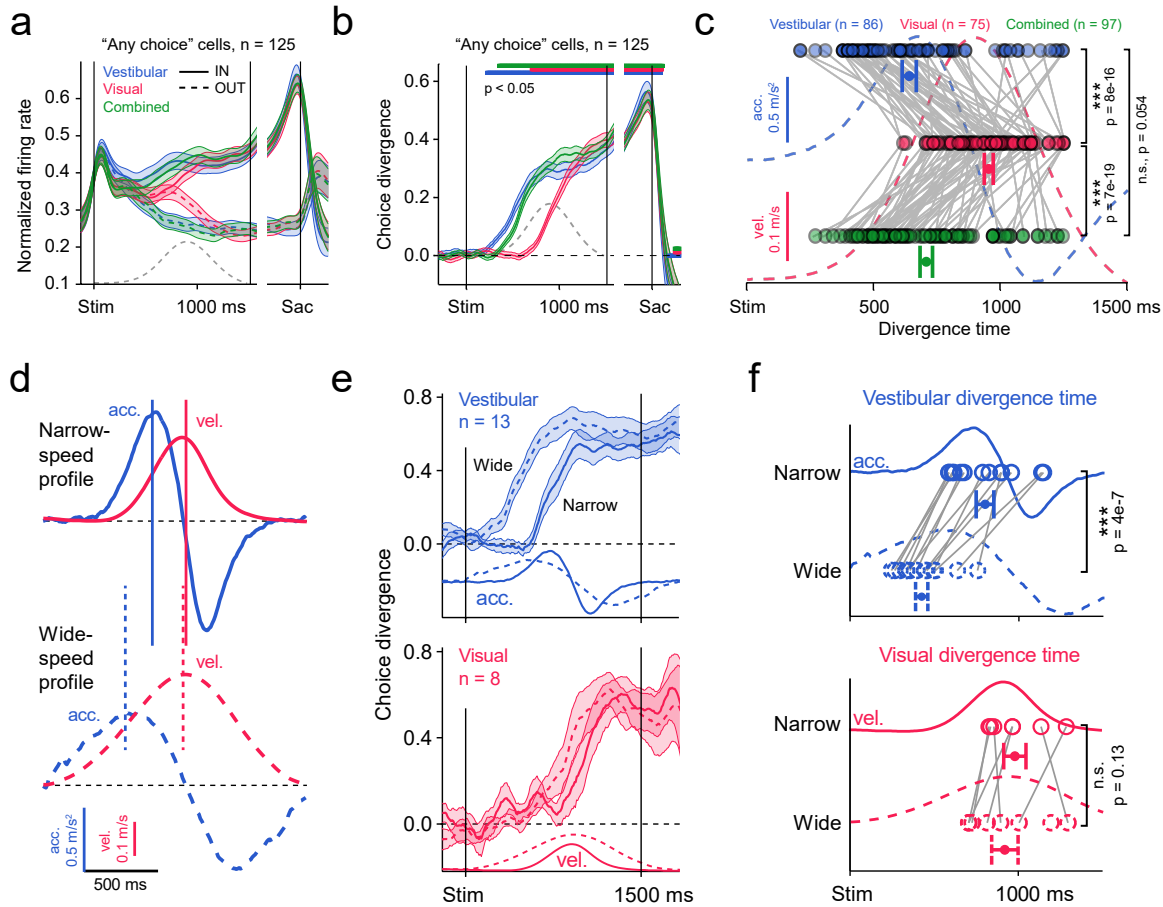

**Figure 3 LIP integrates vestibular acceleration but visual speed.**

**(a and b)** Population average of normalized PSTHs **(a)** and CD **(b)** from 125 “any choice” cells. The vestibular (blue) and combined (green) CDs ramped up much earlier than the visual one (red). Horizontal color bars indicate the time epochs in which population CDs are significantly larger than zero ( $p < 0.05$ , t-test). Gray dashed curve, the actual Gaussian speed profile; shaded error bands, s.e.m. **(c)** Divergence time of cells with significant grand CD for each condition. Divergence time was defined as the first occurrence of a 250-ms window in which CD was consistently larger than zero ( $p < 0.05$ , permutation test). Gray lines connect data from the same cells; acceleration and speed profiles shown in the background. Data points with horizontal error bars, mean  $\pm$  s.e.m. of population divergence time; p values, t-test. **(d)** Two motion profiles used to isolate contributions of acceleration and speed to LIP ramping. Top and solid, the narrow-speed profile; bottom and dashed, the wide-speed profile; blue, acceleration; red, speed. Note that by widening the speed profile, we shifted the time of acceleration peak forward (blue vertical lines) while keeping the speed peak unchanged (red vertical lines). **(e)** Vestibular and visual CDs under the two motion profiles. **(f)** Comparison of divergence time between narrow and wide profiles. Note that the vestibular divergence time was significantly shifted, whereas the visual one was not, indicating that LIP integrates sensory evidence from vestibular acceleration and visual speed.

209 amplitude of acceleration and velocity, respectively (<sup>8</sup>Drugowitsch, *et al.*, 2014).

210

## 211 Network model implementing iPPC for multisensory decision making

212 Next, we developed a neural model of multisensory decision making (refer to as M1 thereafter)  
213 which takes as input vestibular neurons tuned to acceleration and visual neurons tuned to velocity  
214 as observed *in vivo* (equation (2) and (3) in **Methods; Figure 4a**). These inputs converge onto an  
215 integration layer which takes the sum of the visual and vestibular inputs, as well as integrates this  
216 summed input over time. This layer projects in turn to an output layer, labeled LIP, which sums the  
217 integrated visuo-vestibular inputs with the activity from another input layer encoding the two  
218 possible targets to which the animal can eventually saccade (**Figure 4b, c**). As long as the input  
219 layers encode the sensory inputs with iPPC, this simple network can be shown analytically to  
220 implement the Bayes optimal solution even when the reliability of the sensory inputs vary over  
221 time as is the case in our experiment (<sup>9</sup>Beck, *et al.*, 2008; <sup>10</sup>Ma, *et al.*, 2006). Note that separating  
222 the integration layer from the LIP layer is not critical to our results. We did so to reflect the fact  
223 that current experimental data suggest that LIP may not be the layer performing the integration *per*  
224 *se*, but may only reflect the results of this integration (<sup>27</sup>Katz, *et al.*, 2016).

225

226 In an iPPC, the gain, or amplitude, of the tuning curves of the neurons should be proportional to  
227 the reliability of the encoded variable. For instance, in the case of vestibular neurons, the amplitude  
228 of the tuning curves to heading should scale with acceleration. *In vivo*, however, the responses of  
229 vestibular and visual neurons are not fully consistent with the assumption of iPPC because while  
230 the amplitude does increase with reliability, in some neurons, the baseline activity decreases with  
231 reliability (equation (2) and (3) in **Methods** and **Supplementary Figure 6a**). This violation of the  
232 iPPC assumption implies that a simple sum of activity could incur an information loss. Fortunately,  
233 this information loss is small for a population of neurons with tuning properties similar to what has

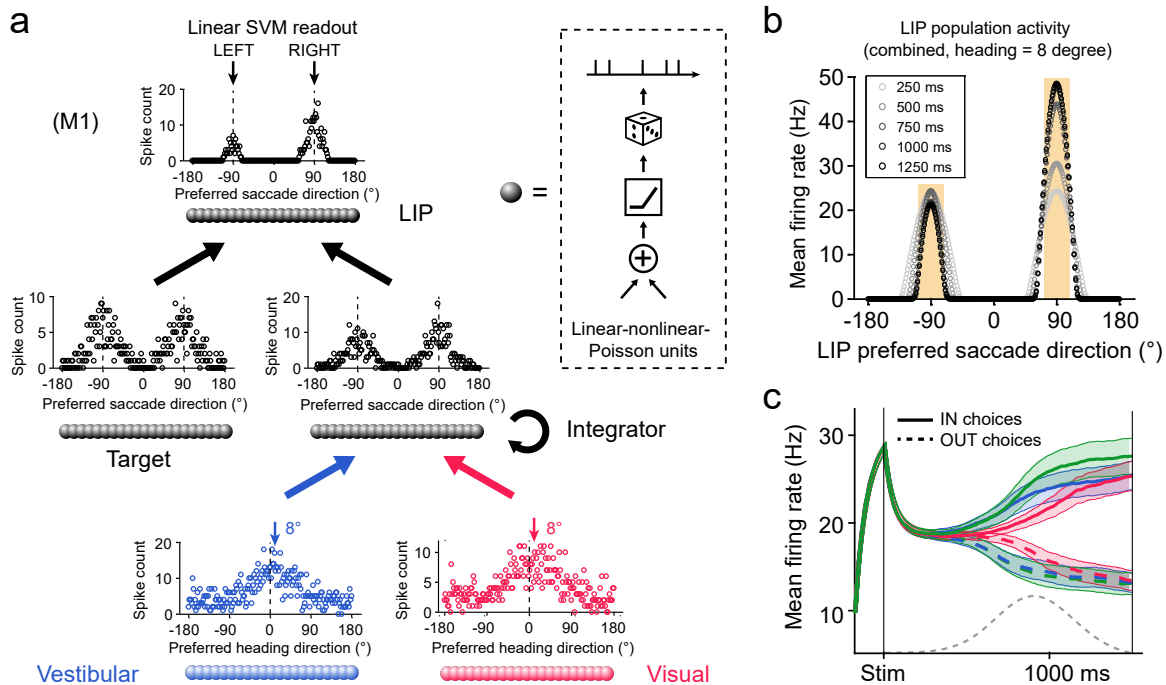

**Figure 4 Neural network model with invariant linear probabilistic population codes (ilPPC).**

**(a)** Network architecture of model M1. The model consists of three interconnected layers of linear-nonlinear-Poisson units (inset). Units in Vestibular and Visual layers have bell-shaped ilPPC-compatible tuning curves for heading direction and receive heading stimuli with temporal dynamics following acceleration and speed, respectively. The intermediate Integrator layer simply sums the incoming spikes from the two sensory layers over time and transforms the tuning curves for heading direction to that for saccade direction ( $-90^\circ$ , leftward choice;  $+90^\circ$ , rightward choice). The LIP layer receives the integrated heading inputs from the Integrator layer, together with visual responses triggered by the two saccade targets. LIP units also have lateral connections implementing short-range excitation and long-range inhibition. Once a decision boundary is hit, or when the end of the trial is reached (1.5 s), LIP activity is decoded by a linear support vector machine for action selection (see **Methods**). Circles indicate representative patterns of activity for each layer; spike counts from 800–1000 ms; combined condition,  $8^\circ$  heading. **(b)** Population firing rate in the LIP layer at five different time points (the same stimulus as in **a**, averaged over 100 repetitions). **(c)** Average PSTHs across LIP population. Trials included three cue conditions and nine heading directions ( $\pm 8^\circ$ ,  $\pm 4^\circ$ ,  $\pm 2^\circ$ ,  $\pm 1^\circ$ ,  $0^\circ$ ). To mimic the experimental procedure, only units with preferred saccade direction close to  $\pm 90^\circ$  were used (with deviation less than  $20^\circ$ ; yellow shaded area in **b**). Notations are the same as in **Figure 2a** and **Figure 3a**.

235 been reported experimentally and information limiting correlations (<sup>28</sup>**Moreno-Bote, *et al.*, 2014**).

236 Indeed, we found numerically that the information loss was around 5% over a wide range of

237 parameters values (Fano factor, mean correlation, baseline changes, and so on) (**Supplementary**

238 **Modeling and Supplementary Figure 6**).

239

240 Importantly, we also endowed the network with a stopping mechanism which terminates sensory

241 integration whenever a function of the LIP population activity reaches a preset threshold (see

242 Methods). Our experiment is not a reaction time experiment and may not require, in principle, such

243 a stopping bound. However, as can be seen in **Figure 3b**, LIP population response saturates around

244 1s, suggesting that evidence integration stops prematurely. This is indeed consistent with the

245 previous results suggesting that animals and humans use a stopping bound even in fixed duration

246 experiments (<sup>29</sup>**Kiani, *et al.*, 2008**).

247

#### 248 **LIP data are compatible with the ilPPC framework**

249 In the first set of simulations on M1, we adjusted the height of the stopping bounds and found that

250 the model can replicate the near optimal animals' performance (**Figure 5a**). We then plotted the

251 activity of a typical output neuron (in the LIP layer) in all three conditions. As expected, the activity

252 in the combined condition is roughly equal to the sum of the vestibular-only activity and visual-

253 only activities (**Figure 5b**), at least in the first half of the trial. In the second half of the trial, the

254 activity in the combined condition deviates strongly from the sum because the traces correspond to

255 averages across trials that terminated at different times on different trials due to the stopping bound.

256

257 Neurons in M1 are homogeneous in the sense that they all take a perfect sum of their vestibular and

258 visual inputs. Importantly, however, optimal integration does not require such a perfect sum; it can

259 also be achieved with random linear combinations of vestibular and visual inputs

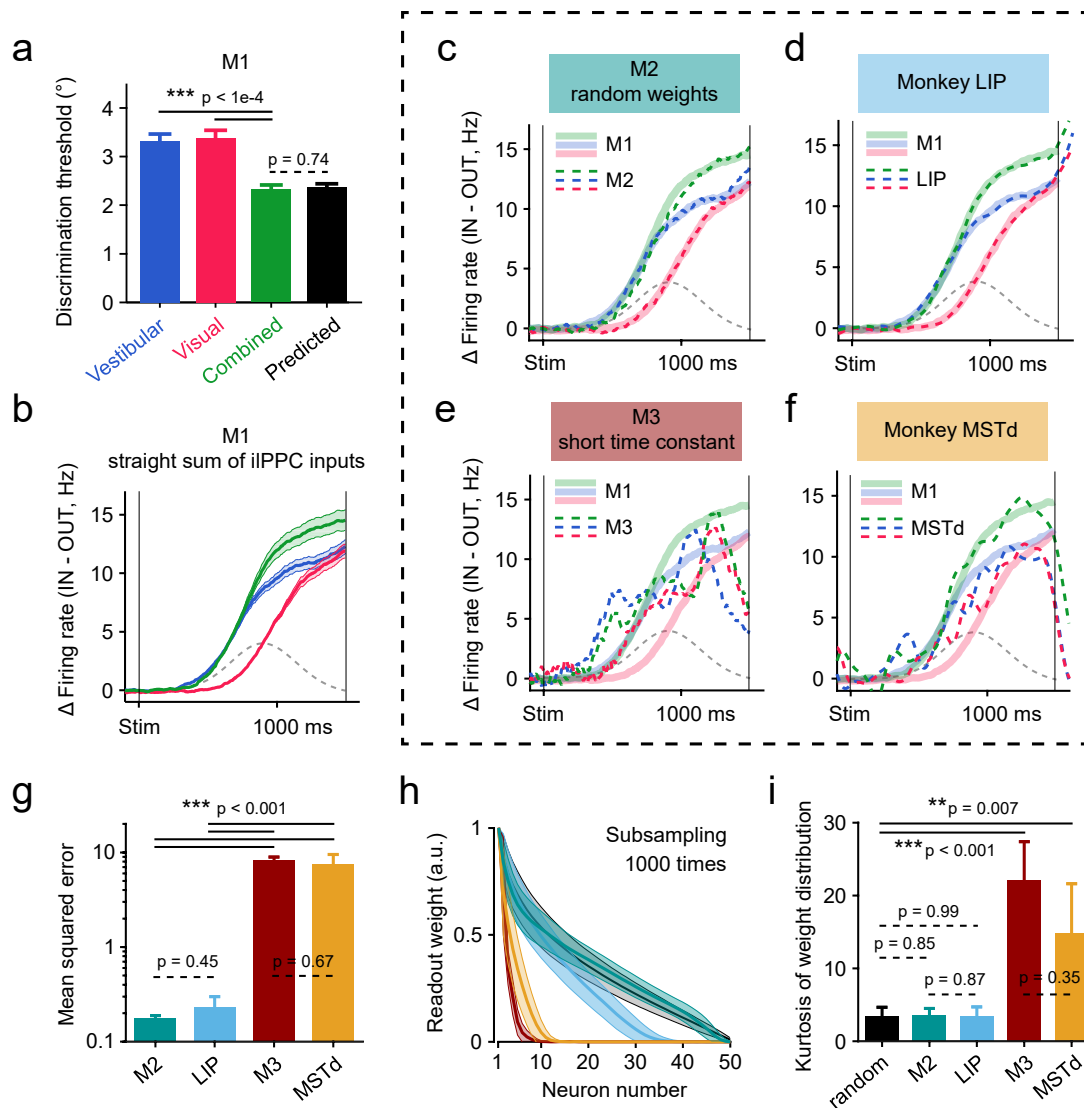

**Figure 5 Optimal iPPC model M1 can be linearly approximated by M2 and LIP but not by M3 and MSTd.**

**(a)** Model M1 exhibited near-optimal behavior as the monkey. The psychophysical threshold under the combined condition (green) was indistinguishable from the Bayesian optimal prediction (black). **(b)** Ramping activity of M1 computed as the difference of PSTHs for IN and OUT trials. Activities from hypothetical units in the LIP layer with preferred direction close to  $\pm 90^{\circ}$  were averaged together (see **Figure 4c** and **Methods**). Since M1 is optimal and homogeneous, we refer to M1's activities as "optimal traces" (see the main text). Notations are the same as before. **(c)** Optimal traces from M1 (thick shaded bands) can be linearly reconstructed by population activities obtained from a heterogeneous model M2 (dashed curves). Model M2 had the same network architecture as M1 except that it relies on random combinations of iPPC inputs in the integration layer (see **Methods**). **(d)** Optimal traces can also be linearly reconstructed by heterogeneous single neuron activities from the LIP data. The similarity between **c** and **d** suggests that both model M2 and monkey LIP are heterogeneous variations of to the optimal iPPC model M1. **(e and f)** In contrast, the optimal traces cannot be reconstructed from activities of a suboptimal model M3 **(e)** or from the MSTd data **(f)**, presumably because the time constants in M3 and MSTd were too short. **(g)** Mean squared error of the fits in panels **c–f**. Error bars and  $p$  values were from subsampling test ( $n = 50$  neurons, 1000 times). **(h)** Normalized readout weights ordered by magnitude. Shaded error bands indicate standard deviations of the subsampling distributions. **(i)** The kurtosis of the distributions of weights. The black curve in **(h)** and black bar in **(e)** were from random readout weights (see **Methods**).



261 (<sup>10</sup>Ma, *et al.*, 2006). Accordingly, we simulated a second model, refer to as M2, in which the visual  
262 and vestibular weights of each neuron were drawn from lognormal distributions (**Figure 5c** and see  
263 **Methods**). Like M1, model M2 can be tuned to reproduce the Bayes optimal discrimination  
264 thresholds (**Supplementary Figure 7a, b**). However, in contrast to model M1, the neurons showed  
265 a wide range of response profiles closer to what we observed in vivo (**Supplementary Figure 7c**).  
266 In particular, we found that the distribution of visual and vestibular weights was similar in the  
267 model and in LIP data (**Supplementary Figure 7d**).

268

269 Since model M2 is a linear combination away from model M1, we tested whether the response of  
270 M1 neurons could be estimated by linearly combining the response of M2 neurons. Multivariate  
271 linear regression confirmed that M1 response profiles could indeed be perfectly reproduced by  
272 linearly combining M2 responses (**Figure 5c**). Since LIP neurons also appear to be computing  
273 random linear combinations of visual and vestibular inputs, the same result should hold for LIP  
274 responses. This is indeed what we found: the response of M1 neurons can be closely approximated  
275 by linearly combining the response of LIP neurons (**Figure 5d, g and Supplementary Figure 9**).

276

277 This last result is key: it suggests that LIP neurons behave quite similarly to the neurons in M2. The  
278 two sets of neurons, however, differ quite significantly in how they integrate their inputs over time.  
279 LIP neurons display a wide variety of temporal profiles (see **Supplementary Figure 2**), suggesting  
280 that very few neurons act like perfect temporal integrators, in contrast to M2 neurons. Nonetheless,  
281 the fact that linear combinations of LIP neurons could reproduce the response of M1 neurons  
282 indicates that LIP responses provide a basis set sufficiently varied to allow perfect integration at  
283 the population level, a result consistent with what has been recently reported in the posterior parietal  
284 cortex of rats engaged in a perceptual decision making task (<sup>30</sup>Scott, *et al.*, 2017).

285

286 In addition to this second model, we simulated a third model (M3) in which the time constant of

287 the integration layer was reduced to 100 ms. Interestingly, we found that it was not possible to  
288 linearly combine the responses of M3 output neurons to reproduce the traces of the optimal model  
289 M1 (**Figure 5e, g**), thus emphasizing the importance of long integration time constant for fitting  
290 the optimal model. We also wondered whether M1 could be fitted by the response of MSTd neurons,  
291 which are known to combine visual and vestibular responses and whose time constant are believed  
292 to be of the same order as model M3. We found that the fit to M1 from MSTd neurons was markedly  
293 worse than those obtained from M2 and LIP but was close to that from M3 (**Figure 5f, g**). Moreover,  
294 only a small fraction of cells contributed significantly to this fit, in sharp contrast to what we  
295 observed in M2 and LIP (**Figure 5h, i**). In fact, the late phase of M1 responses was captured mostly  
296 by MSTd cells with short time constants who seemed sensitive to deceleration, rather than  
297 integrating cells (**Supplementary Figure 8**).

298

299 Finally, we computed the shuffled Fisher information over time for the models and the experimental  
300 data (**Figure 6**). The Fisher information in a neuronal population is a measure inversely  
301 proportional to the square of the discrimination threshold of an ideal observer (<sup>31</sup>Beck, *et al.*, 2011;  
302 <sup>32</sup>Seung and Sompolinsky, 1993). The shuffled Fisher information is a related measure  
303 corresponding to the information in a data set in which neurons are recorded one at a time, as  
304 opposed to simultaneously, which is the case for our data set (<sup>33</sup>Series, *et al.*, 2004) (see **Methods**).  
305 Our network simulations revealed that the shuffled Fisher information should increase over time in  
306 all conditions, reflecting the temporal accumulation of evidence (**Figure 6a**). In addition, we  
307 observed that this rise in information starts earlier in the vestibular condition than in the visual one  
308 because of the temporal offset between acceleration and velocity. In the combined condition, the  
309 Fisher information follows at first the vestibular condition before exceeding the vestibular trace  
310 once the visual information becomes available. Remarkably, the shuffled Fisher information  
311 estimated from the LIP responses follows qualitatively the same trend as the ones observed in the  
312 model (**Figure 6b**). In contrast to M2 and LIP neurons, shuffled Fisher information in M3 and

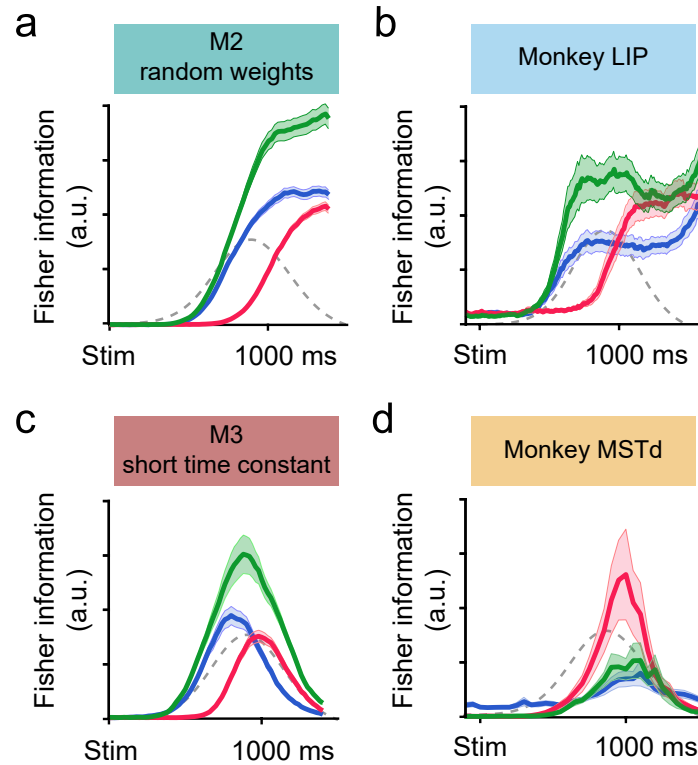

**Figure 6 Shuffled Fisher information for the model and the experimental data.**

(a) Shuffled Fisher information of M2 calculated by  $I_{shuffled} = \sum_i f_i'^2 / \sigma_i^2$ , where  $f_i'$  denotes the derivative of the local tuning curve of the  $i$ th neuron and  $\sigma_i^2$  denotes the averaged variance of its responses around  $0^\circ$  (see **Methods**). Both correct and wrong trials were included. Shaded error bands, s.e.m. estimated from bootstrap. Note that the absolute value of shuffled Fisher information is arbitrary. (b-d) Same as in a but for the monkey LIP data, the M3 responses, and the monkey MSTd data, respectively. Note that LIP is similar to M2, and MSTd to M3.

314 MSTd followed the profile expected for neurons with short time constant: it simply reflected the  
315 velocity profile of the stimulus and did not exhibit the plateau expected from a decision area  
316 (**Figure 6c, d**).

317

318 Taken together, our results are consistent with the notion that MSTd neurons provide the visual  
319 momentary evidence for decision making, while LIP circuits, or circuits upstream from LIP,  
320 implement the near optimal solution of model M1, in the sense that the LIP population activity is a  
321 mere linear transformation away from that solution.

## 322 **Discussion**

323 Integrating ever-changing sensory inputs from different sources across time is crucial for animals  
324 to optimize their decisions in a complex environment, yet little is known about the underlying  
325 mechanisms, either experimentally or theoretically. In the current study, we present, to the best of  
326 our knowledge, the first electrophysiological data on multisensory decision making from non-  
327 human primates. We found that LIP neurons in the macaque posterior parietal cortex encode  
328 ramping decision signals not only for the visual condition, as widely shown in the literature, but  
329 also for the vestibular and combined conditions, except with distinct temporal dynamics.  
330 Importantly, these data are compatible with an iPPC framework where optimal multisensory  
331 evidence accumulation is achieved by simply summing sensory inputs across both modalities and  
332 time, even with mismatched temporal profiles of cue reliabilities and with heterogeneous sensory-  
333 motor representation. Therefore, our results provide the first neural correlate of optimal  
334 multisensory decision making.

335

### 336 **Distinct visual and vestibular temporal dynamics in LIP**

337 By comparing the temporal dynamics of LIP population under different modalities, we found that  
338 LIP neurons accumulate vestibular acceleration and visual speed, which serve as momentary  
339 evidence for their respective modalities. These findings may seem confusing at first glance, since  
340 it is more intuitive to assume that neural circuits would combine evidence with the same temporal  
341 dynamics across cues, namely, either visual and vestibular speed or visual and vestibular  
342 acceleration (<sup>19</sup>Gu, *et al.*, 2006; <sup>34</sup>Chen, *et al.*, 2011a; <sup>35</sup>Fetsch, *et al.*, 2010; <sup>36</sup>Smith, *et al.*, 2017).  
343 In support of this idea, recent studies have found a remarkable transformation from acceleration-  
344 dominated to speed-dominated vestibular signal along the vestibular pathway, i.e. from peripheral  
345 otolith organs to the central nervous system (<sup>37</sup>Laurens, *et al.*, 2017), as well as a moderate but  
346 noticeable further transformation along several sensory cortices (<sup>19</sup>Gu, *et al.*, 2006; <sup>34</sup>Chen, *et al.*,

347 **2011a**; <sup>35</sup>Fetsch, *et al.*, 2010; <sup>37</sup>Laurens, *et al.*, 2017). Given that visual motion responses are  
348 typically dominated by speed (<sup>19</sup>Gu, *et al.*, 2006; <sup>38</sup>Lisberger and Movshon, 1999), one would  
349 think that the brain may deliberately turn the vestibular signal from acceleration- to speed-sensitive  
350 to facilitate the combination with the visual signal.

351

352 However, if the vestibular momentary evidence is proportional to acceleration corrupted by white  
353 noise across time, integrating this evidence to obtain a velocity signal would not simplify decision  
354 making. On the contrary, this step would introduce temporal correlations (<sup>39</sup>Churchland, *et al.*,  
355 **2011**), in which case, even with iPPC, a simple sum of the momentary evidence would no longer  
356 be optimal (<sup>6</sup>Bogacz, *et al.*, 2006). Instead, downstream circuits would have to compute a weighted  
357 sum of the sensory evidence, which would effectively differentiate the momentary evidence before  
358 summing them. In other words, optimal integration would effectively recover the original  
359 acceleration signals. Our results, along with previous psychophysical results (<sup>8</sup>Drugowitsch, *et al.*,  
360 **2014**), strongly suggest that the brain does not go through this extra step and uses the acceleration  
361 signals as momentary evidence instead.

362

### 363 **Multisensory convergence in the brain for heading decision**

364 One of the long-standing questions about multisensory integration is whether integration takes  
365 place early or late along the sensory streams (<sup>40</sup>Bizley, *et al.*, 2016). There are clear signs of  
366 multisensory responses in relatively early- or mid- stage of sensory areas, thus supporting the early  
367 theory (<sup>41</sup>Gu, 2018). Our results are more consistent with the late-convergence theory in which  
368 multisensory momentary evidence are combined across modalities and time in decision areas such  
369 as LIP. However, this dichotomy between early and late theories does not necessarily make sense  
370 given the recurrent nature of the cortical circuitry. In a highly recurrent network, it is notoriously  
371 difficult to identify a node as a primary site of integration. Thus, integration might take place

372 simultaneously across multiple sites but in such a way that the output of the computation is  
373 consistent across sites. For example, **Deneve, *et al.***<sup>42</sup> demonstrated how this could take place in a  
374 large recurrent network performing optimal multisensory integration, though their work did not  
375 consider the problem of temporal integration.

376

377 It might be possible to gain further insight into the distributed nature of multisensory decision  
378 making by combining the previous models with the one we have presented here. Such an extended  
379 model might explain why vestibular momentary evidence is tuned to velocity by the time they  
380 appear in MSTd (<sup>37</sup>**Laurens, *et al.*, 2017**; <sup>41</sup>**Gu, 2018**), and why this velocity tuned vestibular input  
381 does not appear to be integrated in LIP. It could also shed light on recent physiological experiments  
382 in which electrical microstimulation and chemical inactivation in MSTd could dramatically affect  
383 heading discrimination based on optic flow while this effect was largely negligible in the vestibular  
384 condition (<sup>43</sup>**Gu, *et al.*, 2012**). By contrast, and in accord with our finding that LIP integrates  
385 vestibular acceleration, inactivating the vestibular cortex PIVC, where vestibular momentary  
386 evidence is dominated by acceleration (<sup>34</sup>**Chen, *et al.*, 2011a**; <sup>37</sup>**Laurens, *et al.*, 2017**), substantially  
387 diminished the macaque's heading ability based on vestibular cue (<sup>44</sup>**Chen, *et al.*, 2016**). Note,  
388 however, a detailed construction of such a model lies beyond the scope of the present study but will  
389 eventually be required for a multi-area theory of multisensory decision making.

390

### 391 **Computational models for multisensory decision making**

392 Our results indicate that, at the population level, LIP implements an optimal solution for  
393 multisensory decision making under the assumption that the sensory inputs are encoded with ilPPC.  
394 This assumption is not perfectly satisfied in our experiment since the visual and vestibular inputs  
395 deviate from pure ilPPCs, but we saw that this deviation introduces only a minor information loss.  
396 While these results provide the first experimental support for the ilPPC theory of multisensory

397 decision making, it will be important to test in future experiments other predictions of this  
398 framework. In particular, the ilPPC theory predicts that LIP activity encodes a full probability  
399 distribution over choices given the evidence so far (<sup>9</sup>Beck, *et al.*, 2008). Testing this prediction  
400 thoroughly requires simultaneous recording of LIP ensemble, manipulating the cue reliability  
401 (motion profile or visual coherence) on a trial-by-trial basis, and preferably engaging the animals  
402 in a reaction-time task, all of which should be addressed in future studies.

403

404 There are of course other models of decision making which could potentially account for the  
405 responses we have observed in LIP (<sup>45</sup>Chandrasekaran, 2017). In particular, it has been argued  
406 that LIP is part of a network of areas implementing point attractor networks (<sup>46</sup>Wong and Wang,  
407 2006; <sup>47</sup>Wang, 2002). However, it is not immediately clear how this approach can be generalized  
408 to the type of decision we have considered here. Indeed, as we have seen, the optimal solution  
409 depends critically on the code that is used to encode the momentary evidence. To the extent that  
410 this code is close to an ilPPC, the optimal solution is to sum the inputs spikes, in which case one  
411 needs a line attractor network, which is effectively what our network approximates. Therefore, as  
412 long as these previous models of decision making are fine-tuned to approximate line attractor  
413 networks, and as long as they are fed ilPPCs as inputs, the two classes of models would be  
414 equivalent.

415

416 Training recurrent neural network (RNNs) on our task (<sup>48</sup>Mante, *et al.*, 2013; <sup>49</sup>Song, *et al.*, 2017)  
417 provides a third alternative for modeling multisensory decision making. We also tried this approach  
418 and found that the resulting network was capable of reproducing the behavioral thresholds of the  
419 animal while exhibiting a wide variety of single neuron responses similar to what we saw in LIP (  
420 **Supplementary Figure 10**). Nonetheless, this approach has one major drawback: it makes it very  
421 difficult to understand how the network solves the task. We could try to reverse engineer the  
422 network, but given that an analytical solution can be derived from first principles for our task, and



423 given that this solution is close to what we observed in LIP, it is unclear what insight could be  
424 gained from the recurrent network. In contrast, our ilPPC model provides a close approximation to  
425 the optimal solution, consistent with the experimental results, along with a clear understanding as  
426 to why this approach is optimal.

427

428

## 429 **Methods**

### 430 **Subjects and Apparatus**

431 All animal procedures were approved by the Animal Care Committee of Shanghai Institutes for  
432 Biological Sciences, Chinese Academy of Sciences and have been described previously in detail  
433 (<sup>12</sup>Gu, *et al.*, 2008; <sup>19</sup>Gu, *et al.*, 2006). Briefly, two male adult rhesus monkeys, Monkey P and  
434 Monkey M, weighing ~8 kg, were chronically implanted with a lightweight plastic ring for head  
435 restraint and a scleral coil for monitoring eye movements (Riverbend Instruments). During  
436 experiments, the monkey sat comfortably in a primate chair mounted on top of a custom-built  
437 virtual reality system, which consisted of a motion platform (MOOG MB-E-6DOF/12/1000KG)  
438 and an LCD screen (~30 cm of view distance and ~90° × 90° of visual angle; HP LD4201),  
439 presenting vestibular and visual motion stimuli to the monkey, respectively. The stimuli were  
440 controlled by customized C++ software and synchronized with the electrophysiological recording  
441 system by TEMPO (Reflective Computing, U.S.A).

442

443 To tune the synchronization between vestibular and visual stimuli, we rendered a virtual world-  
444 fixed crosshair on the screen while projected a second crosshair at the same place on the screen  
445 using a real world-fixed laser pen. When the platform was moving, we carefully adjusted a delay  
446 parameter in the C++ software (with 1 ms resolution) until the two crosshairs aligned precisely  
447 together all the time, as verified by a high-speed camera (Meizu Pro 5) and/or a pair of back-to-  
448 back mounted photodiodes. This synchronization procedure was repeated occasionally over the  
449 whole period of data collection.

450

### 451 **Behavioral Tasks**

#### 452 *Memory-guided Saccade Task*

453 We used the standard memory-guided saccade task (<sup>50</sup>Barash, *et al.*, 1991) to characterize and

454 select LIP cells for recording in the main decision-making experiments. The monkey fixated at a  
455 central fixation point for 100 ms and then a saccade target flashed briefly (500 ms) in the periphery.  
456 The monkey was required to maintain fixation during the delay period (1000 ms) until the fixation  
457 point extinguished and then saccade to the remembered target location within 1000 ms for a liquid  
458 reward. For all tasks in the present study, at any time when there existed a fixation point, trials were  
459 aborted immediately if the monkey's gaze deviated from a  $2^\circ \times 2^\circ$  electronic window around the  
460 fixation point.

461

### 462 ***Multisensory Heading Discrimination Task***

463 In the main experiments, we trained the monkeys to report their direction of self-motion in a two-  
464 alternative forced-choice heading discrimination task (<sup>12</sup>Gu, *et al.*, 2008) (Figure 1). The monkey  
465 initiated a trial by fixating on a central, head-fixed fixation point, and two choice targets then  
466 appeared. The locations of the two targets were determined case-by-case for each recording session  
467 (see below). After fixating for a short delay (100 ms), the monkey then began to experience a fixed-  
468 duration (1.5 s) forward motion in the horizontal plane with a small leftward or rightward  
469 component relative to straight ahead. The animals were required to maintain fixation during the  
470 presentation of the motion stimuli. At the end of the trial, the motion ended, and the monkey was  
471 required to maintain fixation for another 300–600 ms random delay (uniformly distributed) until  
472 the fixation point disappeared, at which point the monkey was allowed to make a saccade choice  
473 toward one of the two targets to report his perceived heading direction (left or right).

474

475 Across trials, nine heading angles ( $\pm 8^\circ$ ,  $\pm 4^\circ$ ,  $\pm 2^\circ$ ,  $\pm 1^\circ$ , and  $0^\circ$ ) and three cue conditions (vestibular,  
476 visual, and combined) were jointly interleaved, resulting in 27 unique stimulus conditions, each of  
477 which was repeated  $15 \pm 3$  (median  $\pm$  m.a.d.) times per one session. In a vestibular or a visual trial,  
478 heading information was solely provided by inertial motion (real movement of the motion platform)  
479 or optic flow (simulated movement through a star field on the display), respectively, whereas in a

480 combined trial, congruent vestibular and visual cues were provided synchronously. To maximize  
481 the behavioral benefit of cue integration, we balanced the monkey's performance under the  
482 vestibular and the visual conditions by manipulating the motion coherence of the optic flow (the  
483 percentage of dots that moved coherently). The visual coherence was 12% and 8% for monkey P  
484 and M, respectively.

485

486 To ensure that the reliabilities of sensory cues varied throughout each trial, we used Gaussian-shape,  
487 rather than constant, velocity profiles for all motion stimuli. In the main experiments, the Gaussian  
488 profile had a displacement  $d = 0.2\text{ m}$  and a standard deviation  $\sigma = 210\text{ ms}$  (half duration at about  
489 60% of the peak velocity), resulting in a peak velocity  $v_{max} = 0.37\text{ m/s}$  and a peak acceleration  
490  $a_{max} = 1.1\text{ m/s}^2$ . In the experiment where we sought to independently vary the peak times of  
491 velocity and acceleration (**Figure 3**), two additional sets of motion parameters were used. For the  
492 narrow-speed profile,  $d = 0.10\text{ m}$ ,  $\sigma = 150\text{ ms}$ ,  $v_{max} = 0.37\text{ m/s}$ , and  $a_{max} = 1.1\text{ m/s}^2$ ; for  
493 the wide-speed profile,  $d = 0.25\text{ m}$ ,  $\sigma = 330\text{ ms}$ ,  $v_{max} = 0.31\text{ m/s}$ , and  $a_{max} = 0.6\text{ m/s}^2$ .

494

## 495 Electrophysiology

496 We carried out extracellular single-unit recordings as described previously (<sup>12</sup>Gu, *et al.*, 2008) from  
497 four hemispheres in two monkeys. For each hemisphere, reliable area mapping was first achieved  
498 through cross-validation between structural MRI data and electrophysiological properties,  
499 including transition patterns of gray/white matter along each penetration, sizes of visual  
500 receptive/response field, strengths of spatial tuning to visual and vestibular heading stimuli, and  
501 activities in the memory-guided saccade task. Based on the mapping results, Area LIP was  
502 registered by its spatial relationships with other adjacent areas (VIP, Area 5, MSTd, etc.), its weak  
503 sensory encoding of heading information, and its overall strong saccade-related activity  
504 (**Supplementary Figure 1**). Our recording sites located in the ventral division of LIP, extending

505 from 7–13 mm lateral to the midline and -5 mm (posterior) to +3 mm (anterior) relative to the  
506 interaural plane.

507

508 Once we encountered a well-isolated single unit in LIP, we first explored its response field (RF) by  
509 hand (using a flashing patch) and then examined its electrophysiological properties using the  
510 memory-guided saccade task. The saccade target in each trial was randomly positioned at one of  
511 the 8 locations 45° apart on a circle centered on the fixation point (5°–25° radius, optimized  
512 according to the cell's RF location). We calculated online the memory-saccade spatial tuning for  
513 three response epochs: (1) visual response period, 75–400 ms from target onset; (2) delay period,  
514 25–900 ms from target offset; and (3) presaccadic period, 200–50 ms before the saccade onset  
515 (**Supplementary Figure 2**). The cell's spatio-temporal tunings were used to refine its RF location  
516 (via vector sum) and to determine its inclusion in the subsequent decision-making task. Since the  
517 decision-related activity of LIP neurons cannot be strongly predicted by the persistent activity  
518 during the delay period alone (<sup>26</sup>Meister, *et al.*, 2013) (**Supplementary Figure 4b**), we adopted a  
519 wider cell selection criterion than conventionally used, in which we included cells that have  
520 significant spatial selectivity for *any* of the three response epochs (<sup>26</sup>Meister, *et al.*, 2013) (one-  
521 way ANOVA,  $p < 0.05$ , 3–5 repetitions). If the cell met this criterion, then we recorded its decision-  
522 related activity while engaging the monkey in the main multisensory decision-making task, with  
523 the two choice targets being positioned in its RF and 180° opposite to its RF, respectively.

524

525 Although we collected data from a relatively broad sample of LIP neurons, we nevertheless had  
526 two sampling biases during this process. First, we were biased toward cells with strong persistent  
527 activity so that our multisensory data could be better compared with previous unisensory data in  
528 the decision-making literature, where in most cases only these cells were recorded. Second, we  
529 were biased toward cells with RF close to the horizontal line through the fixation point. Unlike the  
530 classical random dot stimuli whose motion direction on the fronto-parallel plane can be aligned

531 with the cell's RF (and the choice targets) session by session, our self-motion stimuli were always  
532 on the horizontal plane and thus were not adjustable according to the cell's RF on the fronto-parallel  
533 plane. As a result, the subjects had to make an additional mapping from their perceived heading  
534 directions (always left or right) to the choice targets (often inclined, and in extreme cases, up or  
535 down). Therefore, to make the task more intuitive to the monkeys and to minimize the potential  
536 influence of this mapping step on neural activity, we discarded a cell if the angle between the  
537 horizontal line and the line connecting the fixation point to its RF exceeded 60°, although we  
538 observed little change in monkeys' behavior even when this angle approached 80°.

539

## 540 **Data Analysis**

### 541 *Psychophysics*

542 To quantify the behavioral performance for both the monkeys and the model in the multisensory  
543 decision-making task, we constructed psychometric curves by plotting the proportion of “rightward”  
544 choices as a function of heading (**Figure 1c**) and fitted them with cumulative Gaussian functions  
545 (<sup>12</sup>Gu, *et al.*, 2008). The psychophysical threshold for each cue condition was defined as the  
546 standard deviation of their respective Gaussian fit. The Bayesian optimal prediction of  
547 psychophysical threshold under the combined condition  $\sigma_{prediction}$  was solved from the inverse  
548 variance rule (<sup>24</sup>Knill and Richards, 1996)

$$549 \quad \frac{1}{\sigma_{prediction}^2} = \frac{1}{\sigma_{vestibular}^2} + \frac{1}{\sigma_{visual}^2}$$

550 where  $\sigma_{vestibular}$  and  $\sigma_{visual}$  represent psychophysical thresholds under the vestibular and visual  
551 conditions, respectively.

552

### 553 *Choice-related neural activities*

554 We constructed peri-stimulus time histograms (PSTHs) for two epochs of interest in a trial, the

555 decision formation epoch and the saccade epoch, by aligning raw spike trains to the stimulus onset  
556 and the saccade onset, respectively. Firing rates were computed in non-overlapping 10-ms bins and  
557 smoothed over time by convolving with a Gaussian kernel ( $\sigma = 50$  ms). Unless otherwise noted,  
558 only correct trials were used in the following analyses, except for the ambiguous  $0^\circ$  heading where  
559 we included all complete trials.

560

561 To illustrate the choice-related activity of a cell, we grouped the trials according to the monkey's  
562 choice, i.e., trials ending up with a saccade toward the cell's RF (IN trials) versus trials ending up  
563 with a saccade away from the cell's RF (OUT trials), and computed the averaged PSTHs of these  
564 two groups of trials for each cue condition (**Figure 2a**). When averaged across cells, each cell's  
565 PSTHs were normalized such that the cell's overall firing rate had a dynamic range of [0, 1] (**Figure**  
566 **3**). To quantify the strength of choice signals and better visualize ramping activities, we calculated  
567 choice divergence (<sup>23</sup>Raposo, *et al.*, 2014) for each 10-ms time bin and for each cue condition using  
568 receiver operating curve (ROC) analysis (**Figure 2b**). Choice divergence ranged from -1 to 1 and  
569 was defined as  $2 \times (\text{AUC} - 0.5)$ , where AUC represents the area under the ROC curve derived  
570 from PSTHs of IN and OUT trials. To capture the onset of choice signals, we computed a  
571 divergence time defined as the time of the first occurrence of a 250-ms window (25 successive 10-  
572 ms bins) in which choice divergence was consistently and significantly larger than 0 (**Figure 3c,**  
573 **f**). The statistical significance of choice divergence ( $p < 0.05$ , relative to the chance level of 0) was  
574 assessed by two-sided permutation test (1000 permutations). We also calculated a grand choice  
575 divergence which ignored temporal information and used all the spikes in the decision formation  
576 epoch (0–1500 ms from the stimulus onset). The same permutation test was performed on the grand  
577 choice divergence to determine whether a cell had overall significant choice signals for a certain  
578 cue condition (for example, in **Figure 2c**).

579

580 ***Linear Fitting of Mean Firing Rates***

581 We fitted a linear weighted summation model to predict neural responses under the combined  
582 condition with those under the single cue conditions, using (<sup>12</sup>Gu, *et al.*, 2008)

583 
$$r_{combined} = w_{vestibular}r_{vestibular} + w_{visual}r_{visual} + C$$

584 where  $C$  is a constant, and  $r_{combined}$ ,  $r_{vestibular}$ , and  $r_{visual}$  are mean firing rates across a trial (0–  
585 1500 ms from stimulus onset) for the three cue conditions, respectively. The weights for single cue  
586 conditions,  $w_{vestibular}$  and  $w_{visual}$ , were determined by the least-squares method and plotted  
587 against each other to evaluate the heterogeneity of choice signals in the population for both LIP  
588 data and the model (**Supplementary Figure 7d**).

589

590 ***Fisher Information Analysis***

591 To compute Fisher information (<sup>32</sup>Seung and Sompolinsky, 1993), the full covariance matrix of  
592 the population responses is needed, but this requires simultaneously recording from hundreds of  
593 neurons, which is not accessible to us yet. Instead, we calculated the shuffled Fisher information,  
594 which corresponds to the information in a population of neurons in which correlations have been  
595 removed (typically via shuffling across trials, hence the name). Shuffled Fisher information is given  
596 by (<sup>33</sup>Series, *et al.*, 2004; <sup>51</sup>Gu, *et al.*, 2010):

597 
$$I_{shuffled} = \sum_{i=1}^N \frac{f_i'^2}{\sigma_i^2} \quad (1)$$

598 where  $N$  is the number of neurons in the population; for the  $i$ th neuron,  $f_i'$  denotes the derivative  
599 of its local tuning curve, and  $\sigma_i^2$  denotes the averaged variance of its responses around 0° heading.

600 The tuning curve  $f_i$  was constructed from both correct and wrong trials grouped by heading angles,  
601 using spike counts in 250-ms sliding windows (advancing in 10-ms steps), and its derivative  $f_i'$   
602 was obtained from the slope of a linear fit of  $f_i$  against headings. The variance  $\sigma_i^2$  was computed  
603 for each heading angle and then averaged. To estimate the standard errors of  $I_{shuffled}$ , we used a



604 bootstrap procedure in which random samples of neurons were drawn from the population by  
605 resampling with replacement (1000 iterations). To compare the experimental data with the model,  
606 we repeated all the above steps on artificial LIP neurons in the model M2 and M3 (see below), with  
607 the inter-neuronal noise correlation being ignored as well (**Figure 6**).

608

609 Two caveats are noteworthy when interpreting the Fisher information results. First, since the slope  
610 of tuning curve  $f'$  is squared in the right-hand side of equation (1), the Fisher information will  
611 always be non-negative regardless of the sign of  $f'$ . As a result, even when the motion speed was  
612 zero at the beginning of a trial, the population Fisher information already had a positive value  
613 because of the noisy tuning curves during that period. Second, since we ignored inter-neuronal  
614 noise correlations,  $I_{shuffled}$  is most likely very different from the true Fisher information and thus  
615 its value is arbitrary (<sup>33</sup>Series, *et al.*, 2004). Nonetheless, if we assume the noise correlation  
616 structure of LIP population is similar across cue conditions, we can still rely on the qualitative  
617 temporal evolution of  $I_{shuffled}$  to appreciate how multisensory signals are accumulated across time  
618 and cues in LIP.

619

## 620 Network Simulation of ilPPC Framework

### 621 *The responses of visual and vestibular neurons closely approximate ilPPC*

622 As mentioned previously, an important assumption of ilPPC is that the amplitude of the sensory  
623 tuning curves be proportional to the nuisance parameters (in our case visual speed and vestibular  
624 acceleration) (<sup>9</sup>Beck, *et al.*, 2008). To check whether this is the case for the visual neurons, we  
625 analyzed the spatio-temporal tuning curves of neurons in area MSTd (data from (<sup>19</sup>Gu, *et al.*, 2006)).  
626 We noticed that, for some neurons, the average tuning curves are not fully consistent with the ilPPC  
627 assumption (**Supplementary Figure 6a**). Briefly, the mean firing rate of an MSTd neuron at time  
628  $t$  in response to a visual stimulus with heading  $\theta$  can be well captured by

629 
$$f(\theta, t) = v(t)(A \exp[K(\cos(\theta - \theta_i) - 1)] - C) + B \quad (2)$$

630 where  $\theta_i$  denotes the preferred heading of the neuron  $i$  and  $v(t)$  is the velocity profile;  $A$ ,  $K$ ,  $C$ ,  
631 and  $B$  correspond to the amplitude, the width, the null inhibition, and the baseline of its tuning  
632 curve, respectively. The ilPPC framework requires the  $v(t)$  term to be separable, namely,  $f(\theta, t) =$   
633  $h(\theta)g(v(t))$ , where  $h(\theta)$  is a pure spatial component and  $g(v(t))$  is a multiplicative gain function  
634 (<sup>9</sup>Beck, *et al.*, 2008; <sup>10</sup>Ma, *et al.*, 2006). In equation (2), this requirement is equivalent to  $C = 0$   
635 and  $B = 0$ , however, we found that some MSTd neurons often had non-zero baselines ( $C > 0$  and  
636  $B > 0$ ). This will be harmful to the optimality of the ilPPC framework because, for example, when  
637  $v(t) = 0$  (and thus the sensory reliability is zero), MSTd neurons still tend to generate background  
638 spikes, which will bring nothing but noise into the simply summed population activity of  
639 downstream areas in an ilPPC network.

640

641 To estimate the information loss due to this deviation, we simulated a population of MSTd neurons  
642 with heterogeneous spatio-temporal tuning curves similar to what has been found experimentally  
643 (<sup>19</sup>Gu, *et al.*, 2006). We calculated the information that can be decoded from the population by a  
644 series of optimal decoders  $I_{optimal}$  and that can be recovered by the ilPPC solution  $I_{ilPPC}$ . We  
645 assumed that the population responses in MSTd contains differential correlations (<sup>28</sup>Moreno-Bote,  
646 *et al.*, 2014) such that the discrimination threshold of an ideal observer of MSTd activity was of  
647 the same order as the animal's performance. Under such conditions, we found that the information  
648 loss  $(I_{optimal} - I_{ilPPC})/I_{optimal}$  was around 5%. Detailed calculations of information loss are  
649 provided in the **Supplementary Materials**. Therefore, the population response of MSTd neurons  
650 provide a close approximation to an ilPPC, in the sense that simply summing the activity of MSTd  
651 neurons over time preserve 95% of the information conveyed by these neurons.

652

653 We also checked whether the ilPPC assumption holds in the case of vestibular neurons. Equation

654 (2) above still provides a good approximation to vestibular tuning curves, except that  $C$  is close to  
655 zero for most neurons (<sup>37</sup>Laurens, *et al.*, 2017), in which case the information less is even less  
656 pronounced.

657

### 658 *Network Model Implementing the ilPPC solution (Model M1)*

659 We extended a previous ilPPC network model for unisensory decision making (<sup>9</sup>Beck, *et al.*, 2008)  
660 to our multisensory decision-making task. Two sensory layers, the vestibular layer and the visual  
661 layer, contained 100 linear-nonlinear-Poisson (LNP) neurons with bell-shape tuning curves to the  
662 heading direction (equation (2)). For the  $i$ th neuron in the vestibular or visual layer, the probability  
663 of firing a spike at time step  $[t_n - \delta t, t_n]$  was given by

$$664 \quad p(r_i^\bullet(t_n) = 1) = [\delta t (g_\bullet(t) (A \exp[K(\cos(\theta - \theta_i) - 1)] - C) + B) + n_i]^+ \quad (3)$$

665 where  $\bullet \in \{\text{VEST}, \text{VIS}\}$ ,  $A, K, C, B, \theta$ , and  $\theta_i$  have the same meanings as in equation (2),  $n_i$  is a  
666 correlated noise term, and  $[\cdot]^+$  is the threshold-linear operator:  $[x]^+ = \max(x, 0)$ . The spatial  
667 tuning was gain-modulated by a time-dependent function  $g_\bullet(t)$ , which modeled the reliability of  
668 the sensory evidence and took the form

$$669 \quad g_{\text{VEST}}(t) = c_{\text{VEST}} |\hat{a}(t)|, \quad g_{\text{VIS}}(t) = c_{\text{VIS}} \hat{v}(t)$$

670 in which  $\hat{a}(t)$  and  $\hat{v}(t)$  are the same acceleration and velocity profiles as the experiments but with  
671 the maximum values normalized to 1, respectively, whereas  $c_{\text{VEST}}$  and  $c_{\text{VIS}}$  are scaling parameters  
672 used to control the signal-to-noise ratio of sensory inputs and to balance the behavior performance  
673 between the two cue conditions like in the experiments. The noise  $n_i$  in equation (3) was generated  
674 by convolving independent Gaussian noise with a circular Gaussian kernel,

$$675 \quad n_i = \sum_j A_\eta \exp\left(K_\eta (\cos(\theta_i - \theta_j) - 1)\right) \eta_j$$

676 where  $\eta_j \sim i. i. d. N(0,1)$ , and  $A_\eta$  and  $K_\eta$  were set to  $10^{-5}$  and 2, respectively. Other parameters  
677 we used were:  $A = 60$  Hz,  $K = 1.5$ ,  $C = 10$  Hz,  $B = 20$  Hz,  $c_{\text{VEST}} = c_{\text{VIS}} = 2.4$ ,  $\delta t = 1$  ms.

678 Note that in equation (3), the gain  $g_{\bullet}(t)$  cannot be factored out because  $B > 0$ , which is the same  
 679 case as in MSTd (equation (2)). Accordingly, the neural code of M1's sensory layers is not exact  
 680 ilPPC (<sup>9</sup>Beck, *et al.*, 2008). However, it is still a close approximation to ilPPC, since we have shown  
 681 in the previous section that MSTd is 95% ilPPC-compatible.

682

683 The two sensory layers then projected to 100 LNP neurons in the integrator layer. We distinguished  
 684 the integrator layer from the LIP layer because there are reasons to believe that LIP reflects the  
 685 integration of the evidence but may not implement the integration *per se* (<sup>27</sup>Katz, *et al.*, 2016). The  
 686 integrator layer summed the sensory responses across both cues and time,

$$687 \quad m_i^{\text{INT}}(t_{n+1}) = m_i^{\text{INT}}(t_n) + g_{stim}(t_n) \left( \sum_j W_{ij}^{\text{INTVEST}} r_j^{\text{VEST}}(t_n) + \sum_j W_{ij}^{\text{INTVIS}} r_j^{\text{VIS}}(t_n) \right) \quad (4)$$

688 where  $m_i^{\text{INT}}$  denotes the membrane potential proxy of neuron  $i$ ,  $W_{ij}^{\text{INTVEST}}$  and  $W_{ij}^{\text{INTVIS}}$  are  
 689 matrices for the feedforward weights from the vestibular and visual layer to the integrator layer,  
 690 respectively, and  $g_{stim}(t_n)$  is an attentional gain factor (see below). Note that we ignored the issue  
 691 of how neural circuits perform perfect integration and just assumed that they do. We could have  
 692 simulated one of the known circuit solutions to this problem (<sup>52</sup>Goldman, 2009), but this would  
 693 not have affected our results, while making the simulation considerably more complicated.

694

695 The feedforward connections  $W_{ij}^{\text{INT}\bullet}$  map the negative and positive heading directions onto the  
 696 two saccade targets, i.e., neurons preferring  $-90^\circ$  and  $+90^\circ$  in the integrator layer, respectively, by

$$697 \quad W_{ij}^{\text{INT}\bullet} = a \exp \left( k \left( \cos(\theta_i^{\text{INT}} - \hat{\theta}) - 1 \right) \right) |\sin(\theta_j^\bullet)|$$

698 in which a step function  $\hat{\theta}$  controls the mapping,

$$699 \quad \hat{\theta} = \begin{cases} -\pi/2, & \text{if } \theta_j^\bullet \leq 0 \\ \pi/2, & \text{if } \theta_j^\bullet > 0 \end{cases}$$

700 We used  $a = 20$  and  $k = 4$  in our simulations. After the linear step, the membrane potential proxy

701 was used to determine the probability of the  $i$ th integrator neuron firing a spike between times  $t_n$   
 702 and  $t_n + \delta t$ ,

$$703 \quad p(r_i^{\text{INT}}(t_n) = 1) = [m_i^{\text{INT}}(t_n)]^+.$$

704

705 Finally, the LIP layer received excitatory inputs from the integrator layer, together with visual  
 706 inputs triggered by the two saccade targets (sent from the target layer). In addition, there were also  
 707 lateral connections in LIP to prevent saturation. In the linear step, the membrane potential proxy of  
 708 the  $i$ th LIP neuron followed

$$709 \quad m_i^{\text{LIP}}(t_{n+1}) = \left(1 - \frac{\delta t}{\tau}\right) m_i^{\text{LIP}}(t_n) + \frac{1}{\tau} \left( \sum_j W_{ij}^{\text{LIPINT}} r_j^{\text{INT}}(t_n) + \sum_j W_{ij}^{\text{LIPTARG}} r_j^{\text{TARG}}(t_n) + \sum_j W_{ij}^{\text{LIP}} r_j^{\text{LIP}}(t_n) \right) \quad (5)$$

710 where the time constant,  $\tau$ , was set to 100 ms;  $W_{ij}^{\text{LIPINT}}$  and  $W_{ij}^{\text{LIPTARG}}$  are weight matrices for the  
 711 feedforward connections from the integrator layer and the target layer to the LIP layer, respectively,  
 712 and  $W_{ij}^{\text{LIP}}$  is the matrix for the recurrent connections within LIP. We used translation-invariant  
 713 weights for all these connections,

$$714 \quad W_{ij} = a \exp(k(\cos(\theta_i - \theta_j) - 1)) + b.$$

715 For  $W_{ij}^{\text{LIPINT}}$ , we used  $a = 15, k = 10, b = -3.6$ ; for  $W_{ij}^{\text{LIPTARG}}$ , we used  $a = 8, k = 5, b = 0$ ;  
 716 and for  $W_{ij}^{\text{LIP}}$ , we used  $a = 5, k = 10, b = -3$ . The term  $r_j^{\text{TARG}}(t_n)$  in equation (5) denotes the  
 717 visual response of the  $j$ th neuron in the target layer induced by the two saccade targets,

$$718 \quad p(r_j^{\text{TARG}}(t_n) = 1) = s_{\text{targ}}(t_n) \sum_{m=1}^2 p_{\text{targ}} \exp(k_{\text{targ}}(\cos(\theta_j^{\text{TARG}} - \theta_m) - 1))$$

719 where  $\theta_1 = -\pi/2$  and  $\theta_2 = \pi/2$ ,  $p_{\text{targ}} = 0.050$ , and  $k_{\text{targ}} = 4$ . The term  $s_{\text{targ}}(t_n)$  modeled the  
 720 saliency of the targets:  $s_{\text{targ}}(t_n) = 1$  before stimulus onset and  $s_{\text{targ}}(t_n) = 0.6$  afterwards.

721

722 After the linear step done in equation (5), the probability of observing a spike from the  $i$ th LIP  
 723 neuron for the next time step was given by, again,

724 
$$p(r_j^{\text{LIP}}(t_{n+1}) = 1) = [m_i^{\text{LIP}}(t_{n+1})]^+. \quad (6)$$

725

726 ***Decision Bound and Action Selection***

727 To let the model make decisions, we endowed it with a stopping bound such that the evidence  
728 integration terminated when the peak activity in the LIP layer reached a threshold value. This  
729 mechanism generates premature decisions in our fixed duration task, which have been observed in  
730 the previous experiments (<sup>29</sup>Kiani, *et al.*, 2008) as well as ours (see the main text). Specifically,  
731 once the firing rate of any neuron in the LIP layer (determined from equation (6)) exceeded  $\Theta^\bullet =$   
732 37 Hz for a vestibular or a visual trial and  $\Theta^{\text{COMB}} = 42$  Hz for a combined trial, we blocked the  
733 sensory inputs to the integrator layer by setting the gain factor in equation (4) to zero:

734 
$$g_{stim}(t_n) = \begin{cases} 1, & \text{if } t_n < t_\Theta \\ 0, & \text{if } t_n \geq t_\Theta \end{cases}$$

735 where  $t_\Theta$  denotes the time of bound crossing. The instantaneous population activity at this time  
736 point  $r^{\text{LIP}}(t_\Theta)$  was then used to determine the model's choice, while the network dynamics  
737 continued to evolve until the end of the 1.5-s trial.

738

739 To read out the model's choice, we trained a linear support vector machine (SVM) to classify the  
740 heading direction from  $r^{\text{LIP}}(t_\Theta)$ . We ran the network for 100 trials, used  $r^{\text{LIP}}(t_\Theta)$  in 30 trials to  
741 train the SVM, and then applied the SVM on the remaining 70 trials to make decisions and generate  
742 psychometric functions of the model (with bootstrap 1000 times, **Figure 5a** and **Supplementary**  
743 **Figure 7a**). The SVM acts like (or even outperforms) a local optimal linear estimator (LOLE)  
744 trained by gradient descent (<sup>33</sup>Series, *et al.*, 2004). Importantly, such decoders could be  
745 implemented with population codes in a biologically realistic point attractor network tuned for  
746 optimal action selection in a discrimination task (<sup>53</sup>Deneve, *et al.*, 1999), which could correspond  
747 to downstream areas such as the motor layer of the superior colliculus (<sup>9</sup>Beck, *et al.*, 2008).

748

### 749 ***Heterogeneous ilPPC Network (M2)***

750 In model M2, we generalized the homogeneous ilPPC network described above (model M1) to a  
751 heterogeneous one. Instead of taking perfect sums like in model M1, neurons in the integration  
752 layer of the model computed random linear combinations of vestibular and visual inputs. It is  
753 indeed been widely shown that integration weights *in vivo* are heterogeneous and are well-captured  
754 by “long-tailed” lognormal distributions (see for example (<sup>54</sup>Song, *et al.*, 2005)). To simulate this  
755 in M2, we drew each synaptic weight  $w_{M2}$  in M2 from a lognormal distribution

$$756 \quad p(w_{M2} = x) = \frac{1}{\sqrt{2\pi}\sigma x} \exp\left(-\frac{(\log x - \mu)^2}{2\sigma^2}\right) \quad (7)$$

757 where  $\mu$  and  $\sigma$  were chosen such that the expectation  $e(w_{M2})$  and the standard deviation  $s(w_{M2})$   
758 of  $w_{M2}$  were both equal to its counterpart synaptic weight  $w_{M1}$  in model M1:

$$759 \quad e(w_{M2}) = s(w_{M2}) = w_{M1}.$$

760 The parameters  $\mu$  and  $\sigma$  in equation (7) were related to  $e$  and  $s$  through

$$761 \quad \begin{aligned} \mu &= \log\left(e^2 / \sqrt{e^2 + s^2}\right) \\ \sigma &= \sqrt{\log(s^2/e^2 + 1)} \quad . \end{aligned}$$

762 If  $w_{M1} < 0$ , a negative sign was added to the resulting  $w_{M2}$ , since lognormal distributions are  
763 always non-negative.

764

### 765 ***Network with Short Integration Time Constant (M3)***

766 We also simulated a sub-optimal model M3 in which the network does not integrate evidence over  
767 time. This was done by replacing equation (4) with

$$768 \quad m_i^{\text{INT}}(t_{n+1}) = \left(1 - \frac{\delta t}{\tau}\right) m_i^{\text{INT}}(t_n) + \frac{1}{\tau} g_{stim}(t_n) \left( \sum_j W_{ij}^{\text{INTVEST}} r_j^{\text{VEST}}(t_n) + \sum_j W_{ij}^{\text{INTVIS}} r_j^{\text{VIS}}(t_n) \right)$$

769 where  $\tau = 100$  ms and other terms are the same as in equation (4).

770

### 771 ***Linear Reproduction of M1 Response***

772 To test whether the responses of the optimal and homogeneous model M1 can be linearly  
 773 reproduced from responses of M2, M3, and the experimental data, we first calculated the “optimal  
 774 traces” from M1 (**Figure 5b**), using

$$775 \quad \Delta PSTH_{M1}^{\bullet} = \langle PSTH_{M1,i}^{\bullet,+} \rangle - \langle PSTH_{M1,i}^{\bullet,-} \rangle$$

776 Where  $\bullet$  denotes three cue conditions (vestibular, visual, and combined),  $PSTH_{M1,i}^{\bullet,+}$  and  
 777  $PSTH_{M1,i}^{\bullet,-}$  denote averaged PSTH for the  $i$ th LIP unit in the network M1 when the network makes  
 778 correct choices towards the neuron’s preferred direction and null direction, respectively, and  $\langle \cdot \rangle$   
 779 denotes averaging across cells. To mimic the experimental procedure, only cells whose preferred  
 780 directions were close to  $\pm 90^\circ$  (with deviations less than  $20^\circ$ ) were used. Similarly, we extracted  
 781 single cell activities from M2, M3, the LIP data, and the MSTd data (**<sup>19</sup>Gu, et al., 2006**)

$$782 \quad \Delta PSTH_{*,i}^{\bullet} = PSTH_{*,i}^{\bullet,+} - PSTH_{*,i}^{\bullet,-}$$

783 where  $* \in \{M2, M3, \text{LIP data}, \text{MSTd data}\}$ . Then we optimized sets of linear weights  $w_*$  to  
 784 minimize the cost function

$$785 \quad E_* = \sum_{\bullet} \sum_n \left( \Delta PSTH_{M1}^{\bullet}(t_n) - \sum_i w_{*,i} \Delta PSTH_{*,i}^{\bullet}(t_n) \right)^2 \quad (8)$$

786 where, for example,  $w_{LIP,i}$  represents the weight of the neuron  $i$  in the LIP data when a  
 787 downstream area reads out LIP dynamics linearly to reproduce the optimal traces. To reduce  
 788 overfitting, we partitioned the data into two subsets along time by randomly assigning the time bins  
 789 into two sets, one for fitting ( $T_{\text{fit}}$ ) and the other for validating ( $T_{\text{valid}}$ ). During fitting, when the  
 790 validating error  $E_{*,t_n \in T_{\text{valid}}}$  started increasing, we stopped the iteration, a procedure known as early  
 791 stopping. The fitting results are shown in **Figure 5c–f**. Note that the  $\Delta PSTH$ s in the cost function  
 792 (equation (8)) grouped all the heading angles together. The results were qualitatively similar when  
 793 the cost function included error terms calculated from each heading angle separately, i.e.,



794 
$$E_* = \sum_{\bullet} \sum_n \sum_{|h|} \left( \Delta PSTH_{M1}^{\bullet, |h|}(t_n) - \sum_i w_{*,i} \Delta PSTH_{*,i}^{\bullet, |h|}(t_n) \right)^2 \quad (9)$$

795 where  $|h|$  denotes the absolute value of heading angle ( $0^\circ$ ,  $1^\circ$ ,  $2^\circ$ ,  $4^\circ$ ,  $8^\circ$ ). The reconstructions of  
796 M1 traces with LIP activities using equation (9) are shown in **Supplementary Figure 9**.

797

798 To assess the robustness of the linear reconstruction, we randomly subsampled the same number of  
799 neurons ( $n = 50$ , without replacement) from the four data sets, performed the linear fitting, and  
800 repeated this procedure for 1000 times. The mean squared error and the distribution of readout  
801 weights of the fittings are shown in **Figure 5g, h**. To examine whether only a small fraction of cells  
802 contributed heavily to the fittings or whether the majority of cells did, we compared the  
803 distributions of weights from the four data sets with the distribution of weights from a random  
804 linear decoder. To do so, for each subsampling, we also generated a set of random readout weights  
805 from a rectified Gaussian distribution (**Figure 5h**, black curve) and computed the kurtosis of the  
806 distribution of weights from the random decoder as well as those from the four data sets (**Figure**  
807 **5i**). The p-values were derived from the empirical subsampling distributions (two-tailed).

808

## 809 **Data and Code Availability**

810 MATLAB code for the network model and the information loss calculation is available at the  
811 following public repository: <https://github.com/hanhou/Multisensory-PPC>. Experimental data and  
812 code for data analysis are available upon request to the authors.

813

## 814 **Acknowledgments**

815 We thank Jianyu Lu, Zhao Zeng, and Xuefei Yu for collecting part of the MSTd data, Wenyao Chen  
816 for monkey care and training, and Ying Liu for C++ software programming. This work was  
817 supported by grants from the National Natural Science Foundation of China Project (31761133014),

818 the Strategic Priority Research Program of CAS (XDBS01070201), the Shanghai Municipal  
819 Science and Technology Major Project (2018SHZDZX05) to Y.G and by grants from the Simons  
820 Collaboration for the Global Brain and the Swiss National Science Foundation (#31003A\_165831)  
821 to A.P.

822

## 823 **Author Contributions**

824 H.H. and Y.G. conceived the project and designed the experiments. H.H., Q.Z., and Y.Z. performed  
825 the experiments. H.H. analyzed the data. H.H. and A.P. developed the models and implemented the  
826 simulations. H.H., A.P., and Y.G. wrote the manuscript.

827

## 828 **Competing financial interests**

829 The authors declare no competing financial interests.

830

## 831 **References**

- 832 1. Ratcliff, R. A theory of memory retrieval. *Psychological review* **85**, 59 (1978).
- 833 2. Ratcliff, R. & McKoon, G. The diffusion decision model: theory and data for two-choice decision  
834 tasks. *Neural computation* **20**, 873-922 (2008).
- 835 3. Ratcliff, R. & Rouder, J.N. Modeling response times for two-choice decisions. *Psychological*  
836 *science* **9**, 347-356 (1998).
- 837 4. Ratcliff, R. & Smith, P.L. A comparison of sequential sampling models for two-choice reaction  
838 time. *Psychol Rev* **111**, 333-367 (2004).
- 839 5. Laming, D.R.J. Information theory of choice-reaction times. (1968).
- 840 6. Bogacz, R., Brown, E., Moehlis, J., Holmes, P. & Cohen, J.D. The physics of optimal decision  
841 making: a formal analysis of models of performance in two-alternative forced-choice tasks. *Psychol*  
842 *Rev* **113**, 700-765 (2006).
- 843 7. Gold, J.I. & Shadlen, M.N. The neural basis of decision making. *Annual review of neuroscience*  
844 **30**, 535-574 (2007).
- 845 8. Drugowitsch, J., DeAngelis, G.C., Klier, E.M., Angelaki, D.E. & Pouget, A. Optimal  
846 multisensory decision-making in a reaction-time task. *Elife* **3** (2014).
- 847 9. Beck, J.M., *et al.* Probabilistic population codes for Bayesian decision making. *Neuron* **60**, 1142-  
848 1152 (2008).
- 849 10. Ma, W.J., Beck, J.M., Latham, P.E. & Pouget, A. Bayesian inference with probabilistic  
850 population codes. *Nat Neurosci* **9**, 1432-1438 (2006).
- 851 11. Fetsch, C.R., Pouget, A., DeAngelis, G.C. & Angelaki, D.E. Neural correlates of reliability-  
852 based cue weighting during multisensory integration. *Nat Neurosci* **15**, 146-154 (2012).

- 853 12. Gu, Y., Angelaki, D.E. & Deangelis, G.C. Neural correlates of multisensory cue integration in  
854 macaque MSTd. *Nat Neurosci* **11**, 1201-1210 (2008).
- 855 13. Fetsch, C.R., DeAngelis, G.C. & Angelaki, D.E. Bridging the gap between theories of sensory  
856 cue integration and the physiology of multisensory neurons. *Nature reviews. Neuroscience* **14**, 429-  
857 442 (2013).
- 858 14. Shadlen, M.N. & Newsome, W.T. Neural basis of a perceptual decision in the parietal cortex  
859 (area LIP) of the rhesus monkey. *Journal of neurophysiology* **86**, 1916-1936 (2001).
- 860 15. Shadlen, M.N. & Newsome, W.T. Motion perception: seeing and deciding. *Proceedings of the*  
861 *National Academy of Sciences of the United States of America* **93**, 628-633 (1996).
- 862 16. Huk, A.C., Katz, L.N. & Yates, J.L. The Role of the Lateral Intraparietal Area in (the Study of)  
863 Decision Making. *Annual review of neuroscience* **40**, 349-372 (2017).
- 864 17. Roitman, J.D. & Shadlen, M.N. Response of neurons in the lateral intraparietal area during a  
865 combined visual discrimination reaction time task. *The Journal of neuroscience : the official*  
866 *journal of the Society for Neuroscience* **22**, 9475-9489 (2002).
- 867 18. Boussaoud, D., Ungerleider, L.G. & Desimone, R. Pathways for Motion Analysis - Cortical  
868 Connections of the Medial Superior Temporal and Fundus of the Superior Temporal Visual Areas  
869 in the Macaque. *J Comp Neurol* **296**, 462-495 (1990).
- 870 19. Gu, Y., Watkins, P.V., Angelaki, D.E. & DeAngelis, G.C. Visual and nonvisual contributions to  
871 three-dimensional heading selectivity in the medial superior temporal area. *The Journal of*  
872 *neuroscience : the official journal of the Society for Neuroscience* **26**, 73-85 (2006).
- 873 20. Chen, A., DeAngelis, G.C. & Angelaki, D.E. Representation of vestibular and visual cues to  
874 self-motion in ventral intraparietal cortex. *The Journal of neuroscience : the official journal of the*  
875 *Society for Neuroscience* **31**, 12036-12052 (2011c).
- 876 21. Chen, A., DeAngelis, G.C. & Angelaki, D.E. Functional Specializations of the Ventral  
877 Intraparietal Area for Multisensory Heading Discrimination. *The Journal of Neuroscience* **33**,  
878 3567-3581 (2013).
- 879 22. Nikbakht, N., Tafreshiha, A., Zoccolan, D. & Diamond, M.E. Supralinear and Supramodal  
880 Integration of Visual and Tactile Signals in Rats: Psychophysics and Neuronal Mechanisms. *Neuron*  
881 **97**, 626-639.e628 (2018).
- 882 23. Raposo, D., Kaufman, M.T. & Churchland, A.K. A category-free neural population supports  
883 evolving demands during decision-making. *Nat Neurosci* **17**, 1784-1792 (2014).
- 884 24. Knill, D.C. & Richards, W. *Perception as Bayesian inference* (Cambridge University Press,  
885 1996).
- 886 25. Park, I.M., Meister, M.L., Huk, A.C. & Pillow, J.W. Encoding and decoding in parietal cortex  
887 during sensorimotor decision-making. *Nat Neurosci* **17**, 1395-1403 (2014).
- 888 26. Meister, M.L., Hennig, J.A. & Huk, A.C. Signal multiplexing and single-neuron computations  
889 in lateral intraparietal area during decision-making. *The Journal of Neuroscience* **33**, 2254-2267  
890 (2013).
- 891 27. Katz, L.N., Yates, J.L., Pillow, J.W. & Huk, A.C. Dissociated functional significance of  
892 decision-related activity in the primate dorsal stream. *Nature advance online publication* (2016).
- 893 28. Moreno-Bote, R., *et al.* Information-limiting correlations. *Nat Neurosci* **17**, 1410-1417 (2014).
- 894 29. Kiani, R., Hanks, T.D. & Shadlen, M.N. Bounded integration in parietal cortex underlies  
895 decisions even when viewing duration is dictated by the environment. *The Journal of neuroscience :*  
896 *the official journal of the Society for Neuroscience* **28**, 3017-3029 (2008).
- 897 30. Scott, B.B., *et al.* Fronto-parietal Cortical Circuits Encode Accumulated Evidence with a  
898 Diversity of Timescales. *Neuron* **95**, 385-398.e385 (2017).
- 899 31. Beck, J., Bejjanki, V.R. & Pouget, A. Insights from a simple expression for linear fisher  
900 information in a recurrently connected population of spiking neurons. *Neural computation* **23**,  
901 1484-1502 (2011).
- 902 32. Seung, H.S. & Sompolinsky, H. Simple models for reading neuronal population codes.  
903 *Proceedings of the National Academy of Sciences of the United States of America* **90**, 10749-10753

- 904 (1993).
- 905 33. Series, P., Latham, P.E. & Pouget, A. Tuning curve sharpening for orientation selectivity: coding  
906 efficiency and the impact of correlations. *Nat Neurosci* **7**, 1129-1135 (2004).
- 907 34. Chen, A., DeAngelis, G.C. & Angelaki, D.E. A comparison of vestibular spatiotemporal tuning  
908 in macaque parietoinsular vestibular cortex, ventral intraparietal area, and medial superior temporal  
909 area. *The Journal of neuroscience : the official journal of the Society for Neuroscience* **31**, 3082-  
910 3094 (2011a).
- 911 35. Fetsch, C.R., *et al.* Spatiotemporal Properties of Vestibular Responses in Area MSTd. *Journal*  
912 *of neurophysiology* **104**, 1506-1522 (2010).
- 913 36. Smith, A.T., Greenlee, M.W., DeAngelis, G.C. & Angelaki, D.E. Distributed Visual-Vestibular  
914 Processing in the Cerebral Cortex of Man and Macaque. *Multisensory Research* **30**, 91-120 (2017).
- 915 37. Laurens, J., *et al.* Transformation of spatiotemporal dynamics in the macaque vestibular system  
916 from otolith afferents to cortex. *Elife* **6**, e20787 (2017).
- 917 38. Lisberger, S.G. & Movshon, J.A. Visual motion analysis for pursuit eye movements in area MT  
918 of macaque monkeys. *The Journal of neuroscience : the official journal of the Society for*  
919 *Neuroscience* **19**, 2224-2246 (1999).
- 920 39. Churchland, A.K., *et al.* Variance as a signature of neural computations during decision making.  
921 *Neuron* **69**, 818-831 (2011).
- 922 40. Bizley, J.K., Jones, G.P. & Town, S.M. Where are multisensory signals combined for perceptual  
923 decision-making? *Current opinion in neurobiology* **40**, 31-37 (2016).
- 924 41. Gu, Y. Vestibular signals in primate cortex for self-motion perception. *Current opinion in*  
925 *neurobiology* **52**, 10-17 (2018).
- 926 42. Deneve, S., Latham, P.E. & Pouget, A. Efficient computation and cue integration with noisy  
927 population codes. *Nat Neurosci* **4**, 826-831 (2001).
- 928 43. Gu, Y., Deangelis, G.C. & Angelaki, D.E. Causal links between dorsal medial superior temporal  
929 area neurons and multisensory heading perception. *The Journal of neuroscience : the official*  
930 *journal of the Society for Neuroscience* **32**, 2299-2313 (2012).
- 931 44. Chen, A., Gu, Y., Liu, S., DeAngelis, G.C. & Angelaki, D.E. Evidence for a Causal Contribution  
932 of Macaque Vestibular, But Not Intraparietal, Cortex to Heading Perception. *The Journal of*  
933 *neuroscience : the official journal of the Society for Neuroscience* **36**, 3789-3798 (2016).
- 934 45. Chandrasekaran, C. Computational principles and models of multisensory integration. *Current*  
935 *opinion in neurobiology* **43**, 25-34 (2017).
- 936 46. Wong, K.F. & Wang, X.J. A recurrent network mechanism of time integration in perceptual  
937 decisions. *The Journal of neuroscience : the official journal of the Society for Neuroscience* **26**,  
938 1314-1328 (2006).
- 939 47. Wang, X.J. Probabilistic decision making by slow reverberation in cortical circuits. *Neuron* **36**,  
940 955-968 (2002).
- 941 48. Mante, V., Sussillo, D., Shenoy, K. & Newsome, W. Context-dependent computation by  
942 recurrent dynamics in prefrontal cortex. *Nature* **503**, 78-84 (2013).
- 943 49. Song, H.F., Yang, G.R. & Wang, X.J. Reward-based training of recurrent neural networks for  
944 cognitive and value-based tasks. *Elife* **6** (2017).
- 945 50. Barash, S., Bracewell, R.M., Fogassi, L., Gnadt, J.W. & Andersen, R.A. Saccade-related activity  
946 in the lateral intraparietal area. I. Temporal properties; comparison with area 7a. *Journal of*  
947 *neurophysiology* **66**, 1095-1108 (1991).
- 948 51. Gu, Y., Fetsch, C.R., Adeyemo, B., Deangelis, G.C. & Angelaki, D.E. Decoding of MSTd  
949 population activity accounts for variations in the precision of heading perception. *Neuron* **66**, 596-  
950 609 (2010).
- 951 52. Goldman, M.S. Memory without Feedback in a Neural Network. *Neuron* **61**, 621-634 (2009).
- 952 53. Deneve, S., Latham, P.E. & Pouget, A. Reading population codes: a neural implementation of  
953 ideal observers. *Nat Neurosci* **2**, 740-745 (1999).
- 954 54. Song, S., Sjostrom, P.J., Reigl, M., Nelson, S. & Chklovskii, D.B. Highly nonrandom features

955 of synaptic connectivity in local cortical circuits. *PLoS biology* **3**, e68 (2005).  
956

957

## 958 **Supplementary Materials**

959 **Supplementary Figure 1. Recording sites and reliable area mapping**

960 **Supplementary Figure 2. More example LIP cells**

961 **Supplementary Figure 3. Task-difficulty dependence of choice signals**

962 **Supplementary Figure 4. Macaque LIP is category-free**

963 **Supplementary Figure 5. De-mixing of choice and modality signals**

964 **Supplementary Figure 6. Information loss of ilPPC solution with heterogeneous MSTd**  
965 **population**

966 **Supplementary Figure 7. Model M2 achieves optimal behavior with heterogeneous units**

967 **Supplementary Figure 8. Example units in linear reconstruction of M1**

968 **Supplementary Figure 9. Linear reconstruction of M1 with cost function calculated for**  
969 **separated heading angles**

970 **Supplementary Figure 10. A trained recurrent neural network (RNN) performing**  
971 **multisensory decision-making task**

972

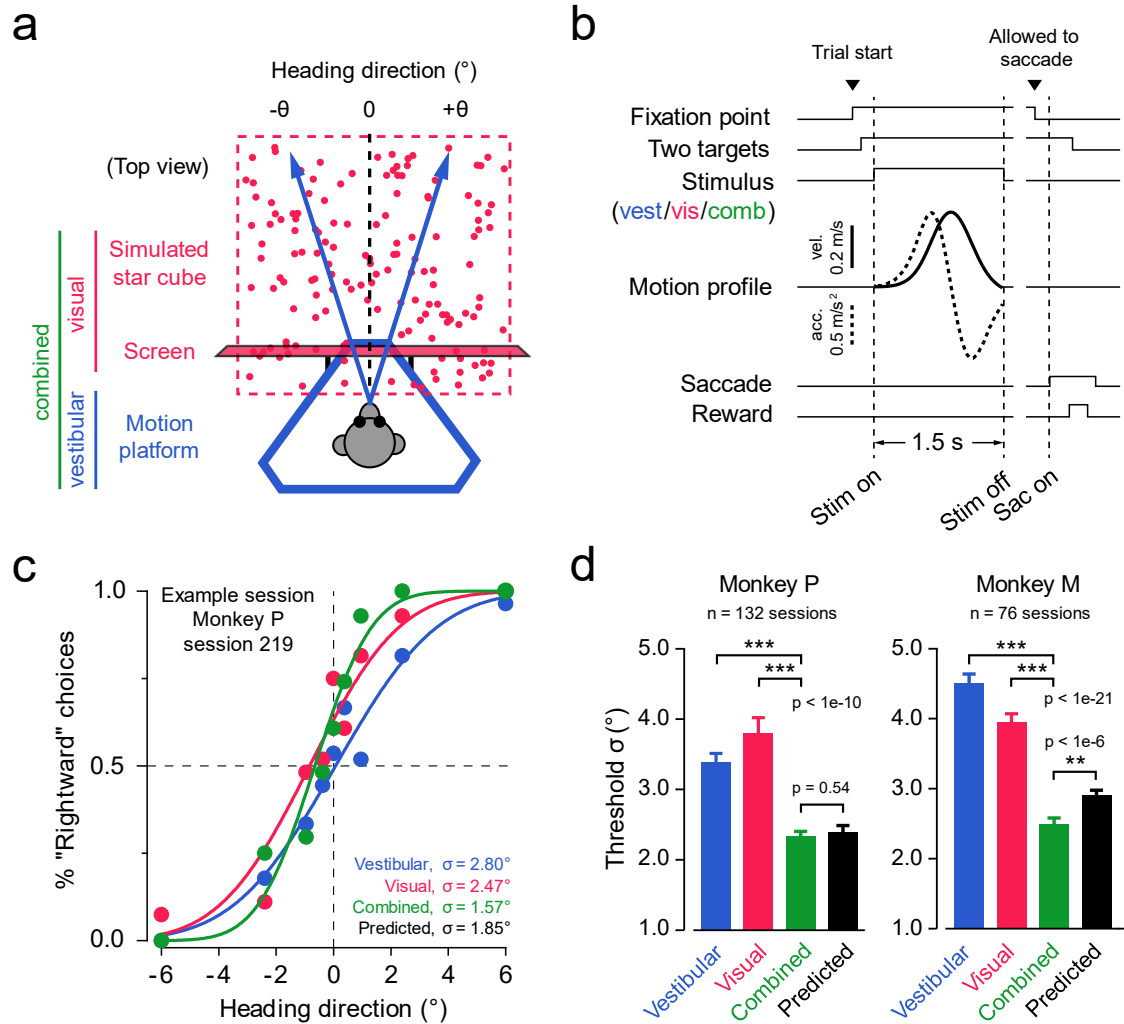

**Figure 1 Optimal cue integration in vestibular-visual multisensory decision-making task.**

(a) Schematic drawing of the experimental setup (top view). The vestibular (blue) and visual (red) stimuli of self-motion were provided by a motion platform and an LCD screen mounted on it, respectively. The monkey was seated on the platform and physically translated within the horizontal plane (blue arrows), whereas the screen rendered optical flow simulating what the monkey would see when moving through a three-dimensional star field (red dots). In a combined condition (green), both vestibular and visual stimuli were presented synchronously. The monkey's task was to discriminate whether the heading direction was to the left or the right of the straight ahead (black dashed line). (b) Task timeline. The monkey initiated a trial by fixating at a fixation point, and two choice targets appeared. The monkey then experienced a 1.5-s forward self-motion stimulus with a small leftward or rightward component, after which the monkey reported his perceived heading by making a saccadic eye movement to one of the two targets. The self-motion speed followed a Gaussian-shape profile. (c) Example psychometric functions from one session. The proportion of "rightward" choices is plotted against the headings for three cue conditions respectively. Smooth curves represent best-fitting cumulative Gaussian functions. (d) Average psychophysical thresholds from two monkeys for three conditions and predicted thresholds calculated from optimal cue integration theory (black bars). Error bars indicate s.e.m.; p values were from paired t-test.

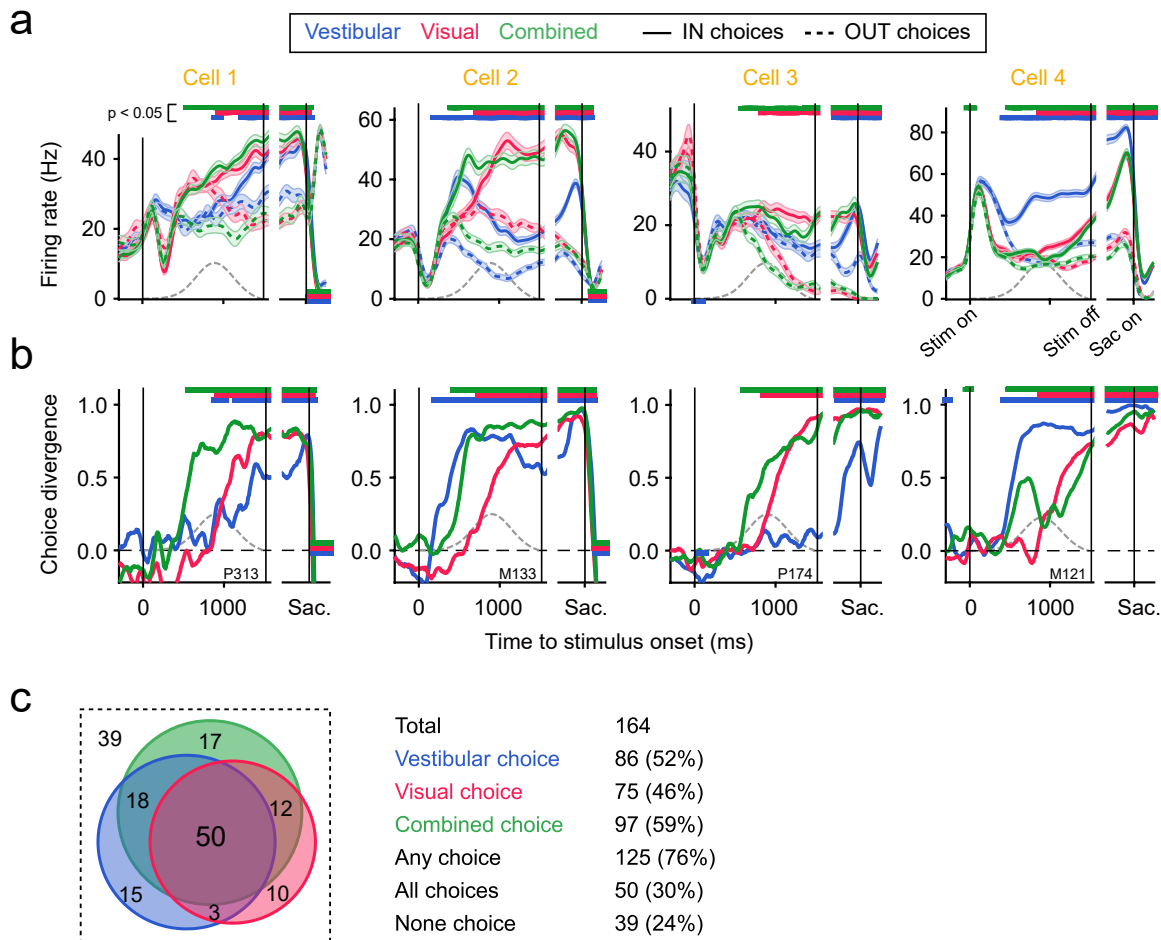

**Figure 2 Heterogeneous choice signals in LIP population.**

**(a)** Peri-stimulus time histograms (PSTHs) of four examples cells. Spike trains were aligned to stimulus onset (left subpanels) and saccade onset (right subpanels), respectively, and grouped by cue condition and monkey's choice. Vestibular, blue; visual, red; combined, green. Toward the cell's response field (RF), or IN choices, solid curves; away from the cell's RF, or OUT choices, dashed curves. Mean firing rates were computed from 10-ms time windows and smoothed with a Gaussian ( $\sigma = 50$  ms); only correct trials or  $0^\circ$  heading trials were included. Shaded error bands, s.e.m. Horizontal color bars represent time epochs in which IN and OUT trials have significantly different firing rates ( $p < 0.05$ , t-test), with the color indicating cue condition and the position indicating the relationship between IN and OUT firings (IN  $>$  OUT, top; IN  $<$  OUT, bottom). Gray dashed curves represent the actual speed profile measured by an accelerometer attached to the motion platform. **(b)** Choice divergence (CD) of the same four cells. CD ranged from -1 to 1 and was derived from ROC analysis for PSTHs in each 10-ms window (see Methods). Horizontal color bars are the same as in **a** except that p-values were from permutation test ( $n = 1000$ ). **(c)** Venn diagram showing the distribution of choice signals. Numbers within colored areas indicate the numbers of neurons that have significant grand CDs (CD computed from all spikes in 0–1500 ms) under the corresponding combinations of cue conditions.





**Figure 3 LIP integrates vestibular acceleration but visual speed.**

**(a and b)** Population average of normalized PSTHs **(a)** and CD **(b)** from 125 “any choice” cells. The vestibular (blue) and combined (green) CDs ramped up much earlier than the visual one (red). Horizontal color bars indicate the time epochs in which population CDs are significantly larger than zero ( $p < 0.05$ , t-test). Gray dashed curve, the actual Gaussian speed profile; shaded error bands, s.e.m. **(c)** Divergence time of cells with significant grand CD for each condition. Divergence time was defined as the first occurrence of a 250-ms window in which CD was consistently larger than zero ( $p < 0.05$ , permutation test). Gray lines connect data from the same cells; acceleration and speed profiles shown in the background. Data points with horizontal error bars, mean  $\pm$  s.e.m. of population divergence time; p values, t-test. **(d)** Two motion profiles used to isolate contributions of acceleration and speed to LIP ramping. Top and solid, the narrow-speed profile; bottom and dashed, the wide-speed profile; blue, acceleration; red, speed. Note that by widening the speed profile, we shifted the time of acceleration peak forward (blue vertical lines) while keeping the speed peak unchanged (red vertical lines). **(e)** Vestibular and visual CDs under the two motion profiles. **(f)** Comparison of divergence time between narrow and wide profiles. Note that the vestibular divergence time was significantly shifted, whereas the visual one was not, indicating that LIP integrates sensory evidence from vestibular acceleration and visual speed.



**Figure 4 Neural network model with invariant linear probabilistic population codes (ilPPC).**

**(a)** Network architecture of model M1. The model consists of three interconnected layers of linear-nonlinear-Poisson units (inset). Units in Vestibular and Visual layers have bell-shaped ilPPC-compatible tuning curves for heading direction and receive heading stimuli with temporal dynamics following acceleration and speed, respectively. The intermediate Integrator layer simply sums the incoming spikes from the two sensory layers over time and transforms the tuning curves for heading direction to that for saccade direction ( $-90^\circ$ , leftward choice;  $+90^\circ$ , rightward choice). The LIP layer receives the integrated heading inputs from the Integrator layer, together with visual responses triggered by the two saccade targets. LIP units also have lateral connections implementing short-range excitation and long-range inhibition. Once a decision boundary is hit, or when the end of the trial is reached (1.5 s), LIP activity is decoded by a linear support vector machine for action selection (see **Methods**). Circles indicate representative patterns of activity for each layer; spike counts from 800–1000 ms; combined condition,  $8^\circ$  heading. **(b)** Population firing rate in the LIP layer at five different time points (the same stimulus as in **a**, averaged over 100 repetitions). **(c)** Average PSTHs across LIP population. Trials included three cue conditions and nine heading directions ( $\pm 8^\circ$ ,  $\pm 4^\circ$ ,  $\pm 2^\circ$ ,  $\pm 1^\circ$ ,  $0^\circ$ ). To mimic the experimental procedure, only units with preferred saccade direction close to  $\pm 90^\circ$  were used (with deviation less than  $20^\circ$ ; yellow shaded area in **b**). Notations are the same as in **Figure 2a** and **Figure 3a**.



**Figure 5 Optimal iPPC model M1 can be linearly approximated by M2 and LIP but not by M3 and MSTd.**

**(a)** Model M1 exhibited near-optimal behavior as the monkey. The psychophysical threshold under the combined condition (green) was indistinguishable from the Bayesian optimal prediction (black). **(b)** Ramping activity of M1 computed as the difference of PSTHs for IN and OUT trials. Activities from hypothetical units in the LIP layer with preferred direction close to  $\pm 90^{\circ}$  were averaged together (see **Figure 4c** and **Methods**). Since M1 is optimal and homogeneous, we refer to M1's activities as "optimal traces" (see the main text). Notations are the same as before. **(c)** Optimal traces from M1 (thick shaded bands) can be linearly reconstructed by population activities obtained from a heterogeneous model M2 (dashed curves). Model M2 had the same network architecture as M1 except that it relies on random combinations of iPPC inputs in the integration layer (see **Methods**). **(d)** Optimal traces can also be linearly reconstructed by heterogeneous single neuron activities from the LIP data. The similarity between **c** and **d** suggests that both model M2 and monkey LIP are heterogeneous variations of to the optimal iPPC model M1. **(e and f)** In contrast, the optimal traces cannot be reconstructed from activities of a suboptimal model M3 **(e)** or from the MSTd data **(f)**, presumably because the time constants in M3 and MSTd were too short. **(g)** Mean squared error of the fits in panels **c–f**. Error bars and  $p$  values were from subsampling test ( $n = 50$  neurons, 1000 times). **(h)** Normalized readout weights ordered by magnitude. Shaded error bands indicate standard deviations of the subsampling distributions. **(i)** The kurtosis of the distributions of weights. The black curve in **(h)** and black bar in **(e)** were from random readout weights (see **Methods**).

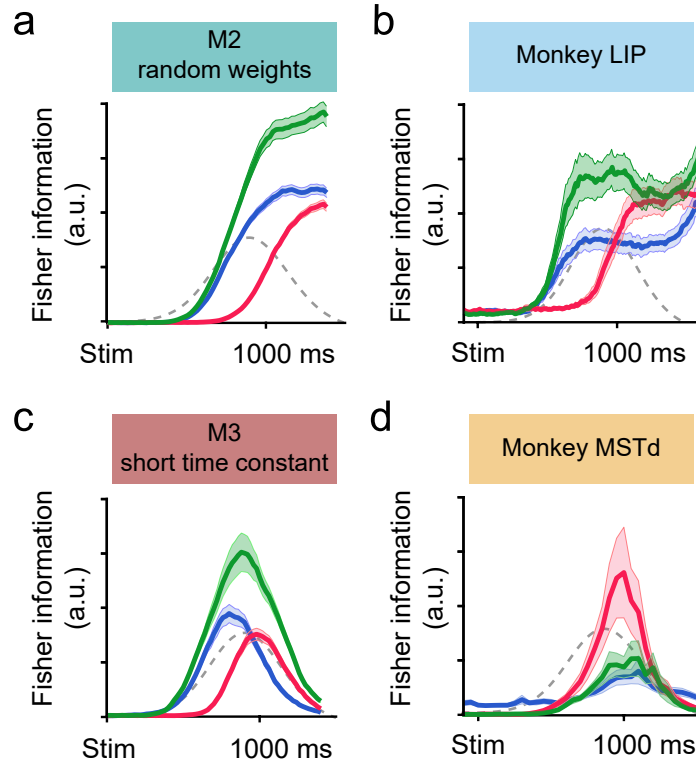

**Figure 6 Shuffled Fisher information for the model and the experimental data.**

(a) Shuffled Fisher information of M2 calculated by  $I_{shuffled} = \sum_i f_i'^2 / \sigma_i^2$ , where  $f_i'$  denotes the derivative of the local tuning curve of the  $i$ th neuron and  $\sigma_i^2$  denotes the averaged variance of its responses around  $0^\circ$  (see **Methods**). Both correct and wrong trials were included. Shaded error bands, s.e.m. estimated from bootstrap. Note that the absolute value of shuffled Fisher information is arbitrary. (b-d) Same as in a but for the monkey LIP data, the M3 responses, and the monkey MSTd data, respectively. Note that LIP is similar to M2, and MSTd to M3.
